# Supplementary material for: Intrinsic cooperativity potentiates parallel cis-regulatory evolution
Source: eLife journal article supplement (doi:10.7554/elife.37563), 2018-09-10

A

*Kl. lactis* extract      *S. cerevisiae* extract

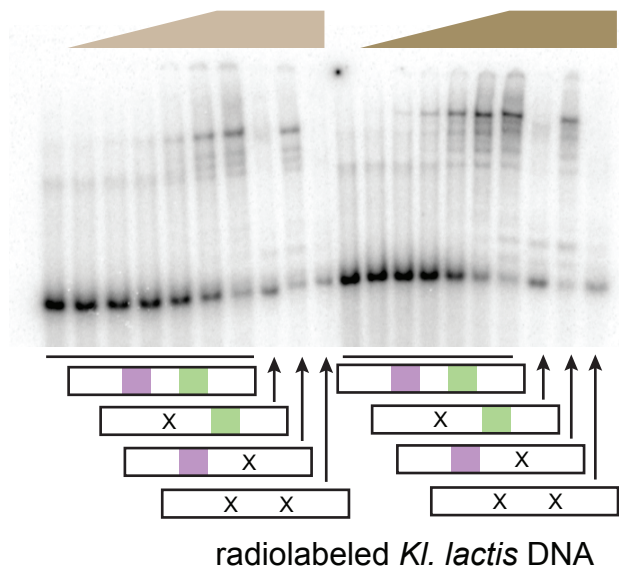

B

*Kl. lactis* extract      *S. cerevisiae* extract

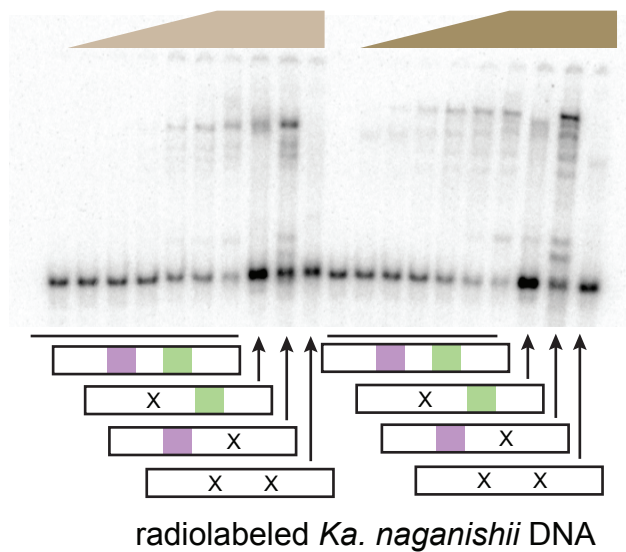

C

*Ka. naganishii* extract      *Ka. africana* extract

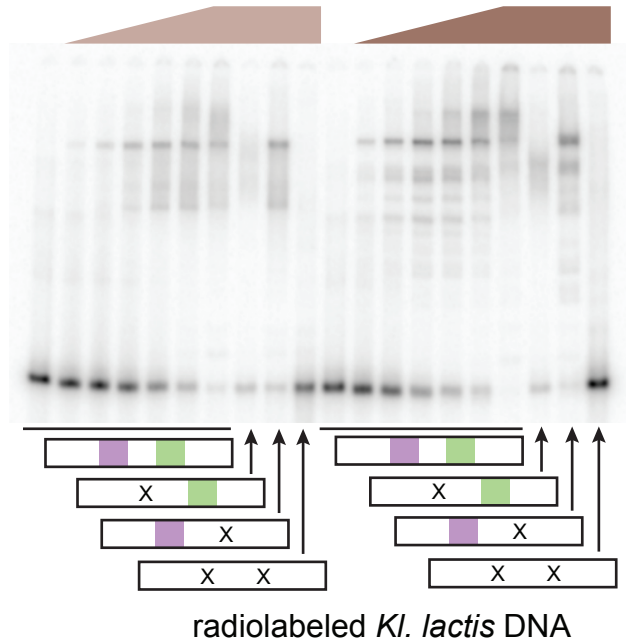

D

*Kl*/Mcm1

*Kl*/Rap1

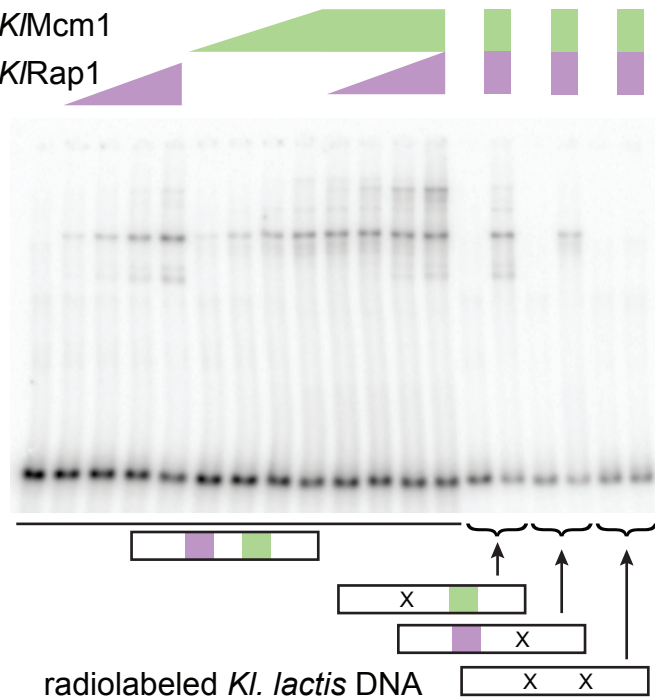

Supplement: supp [file elife-37563-supp-v1.zip]
