# Supplementary material for: Intrinsic cooperativity potentiates parallel cis-regulatory evolution
Source: eLife journal article supplement (doi:10.7554/elife.37563), 2018-09-10
Supplement: supp [file elife-37563-supp-v1.zip]

A

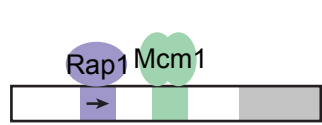

Rap1-Mcm1 sites at non-ribosomal protein genes

|                          |    |
|--------------------------|----|
| <i>S. cerevisiae</i>     | 5  |
| <i>S. uvarum</i>         | 4  |
| <i>C. glabrata</i>       | 7  |
| <i>N. dairenensis</i>    | 10 |
| <i>N. castellii</i>      | 8  |
| <i>K. naganishii</i>     | 33 |
| <i>K. africana</i>       | 6  |
| <i>T. phaffii</i>        | 7  |
| <i>V. polyspora</i>      | 6  |
| <i>T. blattae</i>        | 13 |
| <i>T. delbrueckii</i>    | 2  |
| <i>Z. rouxii</i>         | 2  |
| <i>L. kluyveri</i>       | 8  |
| <i>L. waltii</i>         | 4  |
| <i>L. thermotolerans</i> | 5  |
| <i>E. cymbalariae</i>    | 3  |
| <i>E. gossypii</i>       | 5  |
| <i>K. wickerhamii</i>    | 0  |
| <i>K. lactis</i>         | 7  |

B

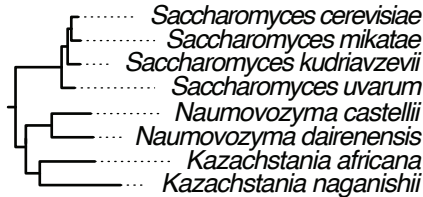

|         | Knag  | Kafk  | Ndai  | Ncas  | Suva  | Kkud  | Smik  | Scer  | Knag  | Kafk | Ndai | Ncas  | Suva | Kkud | Smik  | Scer |
|---------|-------|-------|-------|-------|-------|-------|-------|-------|-------|------|------|-------|------|------|-------|------|
| YDR483W | 8.16  | 10.73 | 3.21  | -0.33 | 1.34  | -1.29 | 1.44  | 1.61  | 7.35  | 4.13 | 9.72 | 3.18  | 0.49 | 1.13 | 4     | 5.11 |
| YCR012W | 9.11  | 10.98 |       | 8.74  |       |       |       |       | 8.92  | 2.44 |      | 3.86  |      |      |       |      |
| YLL039C | 14.84 | 11.04 | 6.04  | 4     |       | 9.36  | 9.36  | 10.23 | 12.63 | 4.59 | 4.72 | 2.8   |      | 2.23 | 10.08 | 4.12 |
| YBR118W | 11.61 | 11.97 | 11.42 | 9.42  | 10.56 | 9.54  | 13.83 | 9.8   | 8.24  | 2.68 | 5.56 | 6.02  | 5.78 | 2.08 | 6.51  | 1.92 |
| YDL076C | 11.97 | 8.88  | 14.81 | 9.37  | 10.84 | 10.95 | 12.48 | 11.17 | 8.75  | 2.87 | 9.49 | 4.08  | 5.53 | 7.28 | 5.11  | 2.87 |
| YLR378C | 10.84 | 9     | 3.48  | 6.5   | 5.07  | 4.52  | 4.66  |       | 7.07  | 3.71 | 6.7  | 4.63  | 4.29 | 6.41 | 4.57  |      |
| YBL032W | 12.89 | 7.38  | 5.63  | 4.36  | 4.74  | 8.24  | 5.47  |       | 9.06  | 1.33 | 2.26 | 0.26  | 3.94 | 0.64 | 7.79  |      |
| YCR032W | 12.06 | 7.99  | 9.39  | 6.9   | 2.69  | 0.23  | 5.65  | 1.5   | 10.6  | 3.39 | 3.26 | 4.04  | 4.89 | 2.3  | 5     | 0.29 |
| YHR135C | 6.3   | 8.28  | 8.9   | 8.61  | 8.34  | 6.93  | 1.3   | 8.34  | 12.19 | 2.9  | 4.99 | 13.07 | 5.14 | 0.54 | -1.42 | 0.39 |
| YLR403W | 12.75 | 7.17  | 3.97  | 4.05  | 7.08  | -0.43 | 4.61  | 0.37  | 11.24 | 4.07 | 2.96 | 3.17  | 3.09 | 4.37 | 4.32  | 5.54 |
| YKL028W | 11.67 | 5.95  | 13.34 | 9.32  | 8.14  | 3.66  | 12.33 | 10.61 | 14.75 | 3.6  | 4.01 | 3.34  | 3.2  | 4    | 4.51  | 7.97 |
| YBR118W | 13.47 | 5.69  | 13.19 | 11.61 | 12.75 | 13.55 | 12.33 | 11.78 | 10.81 | 6.61 | 2.69 | 3.74  | 3.55 | 5.2  | 5.18  | 2.63 |

Mcm1 site gained

|         |       |      |      |      |      |      |      |      |       |       |       |       |       |       |       |       |
|---------|-------|------|------|------|------|------|------|------|-------|-------|-------|-------|-------|-------|-------|-------|
| YCR065W | 12.72 | 2.16 | 3.45 |      |      |      |      |      | 13.5  | 6.7   | 10.11 |       |       |       |       |       |
| YDR170C | 6.21  | 2.74 | 4.52 | 2.5  |      | 2.21 | 0.33 | 1.48 | 9.59  | 7.21  | 1.67  | 0.79  |       | 0.94  | 10.33 | 8.68  |
| YDL222C | 11.67 | 5.25 | 5.84 | 1.12 | 1.92 | 8.87 | 8.87 | 1.08 | 10.13 | 9.25  | 2.74  | 5.29  | -1.05 | 2.72  | 8.53  | 0.85  |
| YPL116W | 12.55 | 0.54 | 9.25 | 2.15 | 1.75 | 1.71 | 4.32 | 3.63 | 13.07 | 9.7   | 11.56 | 12.34 | 3.77  | 1.81  | 5.58  | 3.66  |
| YKL096W | 6.54  | 2.8  | 2.89 | 3.2  | 6.9  | 9.29 |      |      | 10.49 | 11.99 | 12.03 | 9.44  | 11.51 | 5.57  | 2.26  | 6.53  |
| YJL159W | 13.28 | 5.23 | 7.48 | 7.32 | 2.06 | 3.96 | 2.54 | 3.08 | 11.64 | 12.33 | 13.94 | 16.39 | 12.95 | 12.95 | 5.62  | 13.85 |

Rap1 site gained

|           |       |       |      |      |       |       |       |       |       |       |       |       |       |       |       |       |
|-----------|-------|-------|------|------|-------|-------|-------|-------|-------|-------|-------|-------|-------|-------|-------|-------|
| YER130C   | 7.13  | 13.16 | 2.81 | 4.23 | 11.5  | 12.48 | 9.05  | 11.17 | 12.67 | 9     | 2.53  | 4.51  | 6.15  | 3.37  | 6.26  | 5.43  |
| YFL037W   | 9.78  | 9.04  | 4.14 | 3.32 | 3.96  | 2.25  | 3.41  | 0.61  | 15.03 | 12.73 | 11.78 | 13.47 | 5.17  | 3.31  | 4.78  | 4.78  |
| YMR122W-A | 9.28  | 9.54  | 3.21 | 5.64 | 6.74  | 4.57  | 2.83  | 3.08  | 11.56 | 12.57 | 7.37  | 13.55 | 14.42 | 12.3  | 7.47  | 12.3  |
| YCR004C   | 9.03  | 8.64  | 5.34 | 6.2  |       |       |       |       | 7.98  | 6.89  | 5.44  | 4.41  |       |       |       |       |
| YDL055C   | 10.19 | 8.68  | 6.77 | 8.31 | 12.09 | 7.24  | 1.25  | 6.44  | 12.85 | 6.41  | 9.35  | 2.44  | 3.11  | 1.74  | -0.46 | 0.69  |
| YGR253C   | 9.78  | 7.18  | 6.51 | 6.31 | 11.08 | 3.97  | 2.87  | 1.47  | 12.85 | 7.37  | 6.67  | 4.1   | 1.2   | 3.42  | 0.68  | 6.47  |
| YUL046C   | 9.41  | 6.21  | 7.99 | 7.84 | 11.33 | 5.83  | -2.76 | 8.16  | 11.43 | 11.96 | 5.21  | 3.04  | 13.31 | 3.75  | -5.15 | -3.56 |
| YKR097W   | 10.39 | 5.65  | 7.34 | 7.12 | 3.32  | 3.32  | 6.49  | 4.37  | 11.53 | 9.32  | 4.07  | 2.19  | 12.73 | 11.41 | 13.77 | 11.43 |

both sites conserved

|         |       |       |       |       |       |       |       |       |       |      |       |       |        |      |       |       |
|---------|-------|-------|-------|-------|-------|-------|-------|-------|-------|------|-------|-------|--------|------|-------|-------|
| YFL003C | 7.06  | -2.92 | 1.51  | -0.26 | 1.18  | -1.46 | -0.8  | 0.82  | 7.57  | -0.6 | 5.76  | 1.28  | 0.71   | 1.65 | 1.91  | 1.83  |
| YER079W | 12.89 | 4.41  | 5.9   | 1.71  | 4.08  | 3.59  | 4.21  | -4.04 | 6.82  | 0.72 | 6.24  | 5.98  | 6.32   | 1.91 | 3.61  | -0.28 |
| YKR038C | 10.29 | 2.27  | -0.46 | 8.52  |       | -1.28 | -0.31 | 1.22  | 13.4  | 1.31 | -0.27 | 4.48  |        | 1.86 | 4.5   | 2.6   |
| YBR112C | 6.84  | 5.4   | 3.12  | 6.54  | 4.59  |       | 2.49  |       | 8.64  | 1.44 | 4.11  | 3.21  | 1.69   |      | 1.74  |       |
| YBR150C | 7.76  | 3.65  | 4.35  | 2.69  | 6.27  | 5.26  | 3.07  | 5.31  | 10.01 | 2.08 | 4.26  | 4.66  | 6.05   | 6.03 | 0.22  | 4.9   |
| YHR022C | 6.93  | 2.32  | 3.6   | 6.97  | -9.21 | 3.74  | 5.44  | 1.57  | 8.32  | 2.88 | 1.51  | 10.94 | -15.61 | 5.56 | 10.06 | 6.33  |
| YHL012W | 13.28 | 5.61  | 5.69  | 12.06 | 4.31  | 2.34  | 6.73  | 0.87  | 12.98 | 3.51 | 1.35  | 2.49  | 4.63   | 5.47 | 1.5   | 2.79  |
| YOR098C | 6.79  | 5.07  | 1.24  | 1.12  | 2.88  | 2.88  | 2.61  | 0.51  | 9.49  | 5.05 | 2.47  | 1.02  | 3.18   | 2.42 | 8.04  | 1.07  |
| YDR155C | 13.83 | 4.78  | 5.55  | 3.92  | -0.62 | 3.78  | 2.39  | 3.72  | 7.67  | 5.21 | 5.76  | 1.6   | -3.85  | 2.2  | 7.31  | 2.48  |

both sites gained

|         |      |      |       |      |       |       |      |       |       |       |       |      |       |      |       |       |
|---------|------|------|-------|------|-------|-------|------|-------|-------|-------|-------|------|-------|------|-------|-------|
| YEL009C | 12.6 | 4.94 | 11.85 | 9.33 | 0.38  | 7.07  | 1.5  | 5.24  | 12.77 | 13.58 | 5.93  | 1.81 | 3.12  | 3.12 | 4.7   | 3.76  |
| YDR452W | 6.84 | 2.12 | 1     | 1.64 | 1.71  | 6.13  | 3.63 | 2.15  | 11.84 | -0.65 | 2.22  | 3.01 | 9.57  | 12.9 | 12.14 | 10.27 |
| YJR059W | 6.78 | 1.54 | 10.56 | 9.85 | 13.94 | 13.94 | 5.93 | 12.66 | 11.56 | 2.43  | 4.19  | 1.7  | 3.11  | 3.37 | 6.14  | 3.97  |
| YIL122W | 7.61 | 4.04 | 7.09  | 1.02 | 6.13  | 4.5   | 3.75 | 5.99  | 11.9  | 4.22  | 11.66 | 2.2  | 10.87 | 8.96 | 10.74 | 13.66 |
| YDR040C | 6.31 | 3.52 | 10.73 | 7.6  | 8.46  | 7.08  | 7.08 | 12.61 | 7     | 5.35  | 3.5   | 5.84 | 2.32  | 4.52 | 2.72  | 5.3   |

ambiguous

*S. cerevisiae* homolog
