# Supplementary material for: Intrinsic cooperativity potentiates parallel cis-regulatory evolution
Source: eLife. 2018 Sep 10;7:e37563. doi: 10.7554/eLife.37563 (PMC6173580; doi:10.7554/eLife.37563)
Supplement: Supplementary file 1. — The columns indicate the plasmid name, intended species for use, and purpose for creating the plasmid. A reference is given for plasmids from previous studies. [file elife-37563-supp1.xlsx]

## Sheet: plasmids
Name	Species	Purpose	Reference
pET28a RAP1	E. coli	S. cerevisiae His6–Rap1expression.	Garbett et al (2007) MCB
P425 UASGal1-MBP-3C	S. cerevisiae	MBP-3C expression	Feigerle (2016) JBC
P425 UASGal1-MBP-3C-MCM1	S. cerevisiae	S. cerevisiae MBP-3C-Mcm1 expression	this study
pET33b TAF3	E. coli	His6–Taf3 expression	Layer (2010) JBC
pACYC11B TAF12	E. coli	Taf12 expression (co-expressed with Taf4 variants to improve Taf4 expression)	Layer (2010) JBC
pET33b TAF4	E. coli	His6–Taf4 expression	Layer (2010) JBC
pBG101	E. coli	His6–GST expression	Vanderbilt University Center for Structural Biology
pBG101 TAF4	E. coli	His6–GST-Taf4 (1-388) expression	Layer (2010) JBC
pBG101 TAF4(23-388)	E. coli	His6–GST-Taf4 (23-388) expression	Layer (2010) JBC
pBG101 TAF4(55-388)	E. coli	His6–GST-Taf4 (55-388) expression	Layer (2010) JBC
pBG101 TAF4(167-388)	E. coli	His6–GST-Taf4 (167-388) expression	Layer (2010) JBC
pBG101 TAF4(210-388)	E. coli	His6–GST-Taf4 (210-388) expression	Layer (2010) JBC
pBG101 TAF4(233-388)	E. coli	His6–GST-Taf4 (233-388) expression	Layer (2010) JBC
pBG101 TAF4(253-388)	E. coli	His6–GST-Taf4 (253-388) expression	Layer (2010) JBC
pBG101 TAF4(281-388)	E. coli	His6–GST-Taf4 (281-388) expression	Layer (2010) JBC
pBG101 TAF4(309-388)	E. coli	His6–GST-Taf4 (309-388) expression	Layer (2010) JBC
pBG101 TAF4(337-388)	E. coli	His6–GST-Taf4 (337-388) expression	Layer (2010) JBC
pBG101 TAF4(1-62)	E. coli	His6–GST-Taf4 (1-62) expression	Layer (2010) JBC
pBG101 TAF4(1-99)	E. coli	His6–GST-Taf4 (1-99) expression	Layer (2010) JBC
pBG101 TAF4(1-140)	E. coli	His6–GST-Taf4 (1-140) expression	Layer (2010) JBC
pBG101 TAF4(1-217)	E. coli	His6–GST-Taf4 (1-217) expression	Layer (2010) JBC
pBG101 TAF4(1-240)	E. coli	His6–GST-Taf4 (1-240) expression	Layer (2010) JBC
pBG101 TAF4(1-288)	E. coli	His6–GST-Taf4 (1-288) expression	Layer (2010) JBC
pBG101 TAF4(1-316)	E. coli	His6–GST-Taf4 (1-316) expression	Layer (2010) JBC
pBG101 TAF4(1-344)	E. coli	His6–GST-Taf4 (1-344) expression	Layer (2010) JBC
pBG101 TAF4(1-378)	E. coli	His6–GST-Taf4 (1-378) expression	Layer (2010) JBC
pRS415 UASRap1 MYC5-RAP1	S. cerevisiae	Rap1WT expression	Garbett et al (2007) MCB
pRS415 UASRap1 MYC5-RAP1AS	S. cerevisiae	Rap1AS expression	Johnson and Weil (2017) JBC
pRS415 UASRap1 MYC5-RAP1AS 7 Ala	S. cerevisiae	Rap1AS 7Ala expression	Johnson and Weil (2017) JBC
pTS26	K. lactis	K. lactis base GFP reporter plasmid	Sorrells et al (2015) Nature
pTS176	K. lactis	K. lactis reporter (pTS26) with 73bp Rps23 Rap1-Mcm1 operator	this study
pTS177	K. lactis	K. lactis reporter (pTS26) with 73bp Rps23 Rap1-Mcm1 operator scrambled Mcm1	this study
pTS178	K. lactis	K. lactis reporter (pTS26) with 73bp Rps23 Rap1-Mcm1 operator scrambled Rap1	this study
pTS179	K. lactis	K. lactis reporter (pTS26) with 73bp Rps23 Rap1-Mcm1 operator scrambled Mcm1 scrambled Rap1	this study
pTS170	K. lactis	K. lactis reporter with entire Rps18 intergenic region	this study
pTS171	K. lactis	K. lactis reporter with entire Rps18 intergenic region with Mcm1 site scrambled	this study
pTS174	K. lactis	K. lactis reporter with entire Rpl37 intergenic region	this study
pTS175	K. lactis	K. lactis reporter with entire Rpl37 intergenic region with Mcm1 site scrabled	this study
pTS180	S. cerevisiae	S. cerevisiae integrating reporter (pTS61) with Cyc1 promoter with MCS (pTS26) upstream of GFP	this study
pTS181	S. cerevisiae	S. cerevisiae reporter (pTS180) with 73bp Rps23 Rap1-Mcm1 operator	this study
pTS182	S. cerevisiae	S. cerevisiae reporter (pTS180) with 73bp Rps23 Rap1-Mcm1 operator scrambled Mcm1	this study
pTS183	S. cerevisiae	S. cerevisiae reporter (pTS180) with 73bp Rps23 Rap1-Mcm1 operator scrambled Rap1	this study
pTS184	S. cerevisiae	S. cerevisiae reporter (pTS180) with 73bp Rps23 Rap1-Mcm1 operator scrambled Mcm1 scrambled Rap1	this study
pTS189	K. lactis	pTS189-203 Rap1-Mcm1 spacing series midpoint-midpoint 79bp from KlRps23	this study
pTS190	K. lactis	pTS189-203 Rap1-Mcm1 spacing series midpoint-midpoint 77bp from KlRps23	this study
pTS191	K. lactis	pTS189-203 Rap1-Mcm1 spacing series midpoint-midpoint 75bp from KlRps23	this study
pTS192	K. lactis	pTS189-203 Rap1-Mcm1 spacing series midpoint-midpoint 73bp from KlRps23	this study
pTS193	K. lactis	pTS189-203 Rap1-Mcm1 spacing series midpoint-midpoint 71bp from KlRps23	this study
pTS194	K. lactis	pTS189-203 Rap1-Mcm1 spacing series midpoint-midpoint 69bp from KlRps23	this study
pTS195	K. lactis	pTS189-203 Rap1-Mcm1 spacing series midpoint-midpoint 67bp from KlRps23	this study
pTS196	K. lactis	pTS189-203 Rap1-Mcm1 spacing series midpoint-midpoint 65bp from KlRps23	this study
pTS197	K. lactis	pTS189-203 Rap1-Mcm1 spacing series midpoint-midpoint 63bp from KlRps23	this study
pTS198	K. lactis	pTS189-203 Rap1-Mcm1 spacing series midpoint-midpoint 61bp from KlRps23	this study
pTS199	K. lactis	pTS189-203 Rap1-Mcm1 spacing series midpoint-midpoint 59bp from KlRps23	this study
pTS200	K. lactis	pTS189-203 Rap1-Mcm1 spacing series midpoint-midpoint 57bp from KlRps23	this study
pTS201	K. lactis	pTS189-203 Rap1-Mcm1 spacing series midpoint-midpoint 55bp from KlRps23	this study
pTS202	K. lactis	pTS189-203 Rap1-Mcm1 spacing series midpoint-midpoint 53bp from KlRps23	this study
pTS203	K. lactis	pTS189-203 Rap1-Mcm1 spacing series midpoint-midpoint 51bp from KlRps23	this study
pTS209	K. lactis	pT209-224 Rap1-Mcm1 spacing series midpoint-midpoint 80bp from KlRps17	this study
pTS210	K. lactis	pT209-224 Rap1-Mcm1 spacing series midpoint-midpoint 78bp from KlRps17	this study
pTS211	K. lactis	pT209-224 Rap1-Mcm1 spacing series midpoint-midpoint 76bp from KlRps17	this study
pTS212	K. lactis	pT209-224 Rap1-Mcm1 spacing series midpoint-midpoint 74bp from KlRps17	this study
pTS213	K. lactis	pT209-224 Rap1-Mcm1 spacing series midpoint-midpoint 72bp from KlRps17	this study
pTS214	K. lactis	pT209-224 Rap1-Mcm1 spacing series midpoint-midpoint 70bp from KlRps17	this study
pTS215	K. lactis	pT209-224 Rap1-Mcm1 spacing series midpoint-midpoint 68bp from KlRps17	this study
pTS216	K. lactis	pT209-224 Rap1-Mcm1 spacing series midpoint-midpoint 66bp from KlRps17	this study
pTS217	K. lactis	pT209-224 Rap1-Mcm1 spacing series midpoint-midpoint 64bp from KlRps17	this study
pTS218	K. lactis	pT209-224 Rap1-Mcm1 spacing series midpoint-midpoint 62bp from KlRps17	this study
pTS219	K. lactis	pT209-224 Rap1-Mcm1 spacing series midpoint-midpoint 60bp from KlRps17	this study
pTS220	K. lactis	pT209-224 Rap1-Mcm1 spacing series midpoint-midpoint 58bp from KlRps17	this study
pTS221	K. lactis	pT209-224 Rap1-Mcm1 spacing series midpoint-midpoint 56bp from KlRps17	this study
pTS222	K. lactis	pT209-224 Rap1-Mcm1 spacing series midpoint-midpoint 54bp from KlRps17	this study
pTS223	K. lactis	pT209-224 Rap1-Mcm1 spacing series midpoint-midpoint 52bp from KlRps17	this study
pTS224	K. lactis	pT209-224 Rap1-Mcm1 spacing series midpoint-midpoint 50bp from KlRps17	this study
pTS247	K. lactis	K. lactis reporter (pTS26) with 73bp Rps23 Rap1-Mcm1 operator, with added BamHI site, palindromic Mcm1	this study
pTS248	K. lactis	K. lactis reporter (pTS26) with 73bp Rps23 Rap1-Mcm1 operator, with added BamHI site, palindromic Mcm1, Rap1 scrambled	this study
pTS249	K. lactis	K. lactis Rap1 with palindromic Mcm1 site (pTS247) T8 > A mutation	this study
pTS250	K. lactis	K. lactis Rap1 with palindromic Mcm1 site (pTS247) T9 > G mutation	this study
pTS251	K. lactis	K. lactis Rap1 with palindromic Mcm1 site (pTS247) A10 > C mutation	this study
pTS252	K. lactis	K. lactis Rap1 with palindromic Mcm1 site (pTS247) A10 > G mutation	this study
pTS253	K. lactis	K. lactis Rap1 with palindromic Mcm1 site (pTS247) C11 > A mutation	this study
pTS254	K. lactis	K. lactis Rap1 with palindromic Mcm1 site (pTS247) C11 > T mutation	this study
pTS255	K. lactis	K. lactis Rap1 with palindromic Mcm1 site (pTS247) C12 > T mutation	this study
pTS256	K. lactis	K. lactis Rap1 with palindromic Mcm1 site (pTS247) T13 > A mutation	this study
pTS258	K. lactis	K. lactis Rap1 with palindromic Mcm1 site (pTS247) A14 > C mutation	this study
pTS259	K. lactis	K. lactis Rap1 with palindromic Mcm1 site (pTS247) A15 > G mutation	this study
pTS260	K. lactis	K. lactis Rap1 with palindromic Mcm1 site (pTS247) A15 > T mutation	this study
pTS261	K. lactis	K. lactis scrambled Rap1 with palindromic Mcm1 site (pTS247) T8 > A mutation	this study
pTS262	K. lactis	K. lactis scrambled Rap1 with palindromic Mcm1 site (pTS248) T9 > G mutation	this study
pTS263	K. lactis	K. lactis scrambled Rap1 with palindromic Mcm1 site (pTS248) A10 > C mutation	this study
pTS264	K. lactis	K. lactis scrambled Rap1 with palindromic Mcm1 site (pTS248) A10 > G mutation	this study
pTS265	K. lactis	K. lactis scrambled Rap1 with palindromic Mcm1 site (pTS248) C11 > A mutation	this study
pTS266	K. lactis	K. lactis scrambled Rap1 with palindromic Mcm1 site (pTS248) C11 > T mutation	this study
pTS267	K. lactis	K. lactis scrambled Rap1 with palindromic Mcm1 site (pTS248) C12 > T mutation	this study
pTS268	K. lactis	K. lactis scrambled Rap1 with palindromic Mcm1 site (pTS248) T13 > A mutation	this study
pTS270	K. lactis	K. lactis scrambled Rap1 with palindromic Mcm1 site (pTS248) A14 > C mutation	this study
pTS271	K. lactis	K. lactis scrambled Rap1 with palindromic Mcm1 site (pTS248) A15 > G mutation	this study
pTS272	K. lactis	K. lactis scrambled Rap1 with palindromic Mcm1 site (pTS248) A15 > T mutation	this study
pUASRap1WT-HIS3	S. cerevisiae	S. cerevisiae base HIS3 integrating reporter containing two copies of the UASRap1	Mencia et al (2002) Molecular Cell
pUASRPS23(Rap1(WT)-Mcm1(WT))-HIS3	S. cerevisiae	S. cerevisiae HIS3 reporter (pUASRap1WT-HIS3) with the 73bp Rps23 Rap1(WT)-Mcm1(WT) operator replacing the two copies of UASRap1	this study
pUASRPS23(Rap1(WT)-Mcm1(sc))-HIS3	S. cerevisiae	S. cerevisiae HIS3 reporter (pUASRap1WT-HIS3) with the 73bp Rps23 Rap1(WT)-Mcm1(scrambled) operator replacing the two copies of UASRap1	this study
pUASRPS23(Rap1(sc)-Mcm1(WT))-HIS3	S. cerevisiae	S. cerevisiae HIS3 reporter (pUASRap1WT-HIS3) with the 73bp Rps23 Rap1(scrambled)-Mcm1(WT) operator replacing the two copies of UASRap1	this study
pUASRPS23(Rap1(sc)-Mcm1(sc))-HIS3	S. cerevisiae	S. cerevisiae HIS3 reporter (pUASRap1WT-HIS3) with the 73bp Rps23 Rap1(scrambled)-Mcm1(scrambled) operator replacing the two copies of UASRap1	this study
pUASRPS23(Rap1(3T4A)-Mcm1(WT))-HIS3	S. cerevisiae	S. cerevisiae HIS3 reporter (pUASRap1WT-HIS3) with the 73bp Rps23 Rap1(3T4A)-Mcm1(WT) operator replacing the two copies of UASRap1	this study
pUASRPS23(Rap1(3T4A)-Mcm1(sc))-HIS3	S. cerevisiae	S. cerevisiae HIS3 reporter (pUASRap1WT-HIS3) with the 73bp Rps23 Rap1(3T4A)-Mcm1(scrambled) operator replacing the two copies of UASRap1	this study
