# Supplementary material for: Intrinsic cooperativity potentiates parallel cis-regulatory evolution
Source: eLife. 2018 Sep 10;7:e37563. doi: 10.7554/eLife.37563 (PMC6173580; doi:10.7554/eLife.37563)
Supplement: Supplementary file 2. — The columns indicate the strain name, species, and genotype. A reference is given for strains from previous studies. [file elife-37563-supp2.xlsx]

## Sheet: strains
Strain	Species	Genotype	Reference
BY4741	S. cerevisiae	MATa his3∆1 leu2∆0 met15∆0 ura3∆0	Brachman et al (1998) Yeast
YLSTAF1	S. cerevisiae	MATa TAF1-TAP TAG4.5 leu2 trp1 ura3-52 prb1-1122 pep4-3 pre1-451 gal2 G418r	Papai et al (2009) Structure
BY4741 rap1∆	S. cerevisiae	MATa his3∆1 leu2∆0 met15∆0 ura3∆0 rap1∆::hphMX4 (pRS416 UASADH-RAP1)	Layer (2010) JBC
YAM50	S. cerevisiae	MATa his3∆1 leu2∆0 met15∆0 ura3∆0 rap1∆::hphMX4 (pRS416 UASRap1 FLAG3-RAP1) trp1∆::kanMX4 HA3-TAF1 (Scer)UASRPS23(Rap1(WT)-Mcm1(WT))-HIS3::TRP1::DED1	this study
YAM51	S. cerevisiae	MATa his3∆1 leu2∆0 met15∆0 ura3∆0 rap1∆::hphMX4 (pRS416 UASRap1 FLAG3-RAP1) trp1∆::kanMX4 HA3-TAF1 (Scer)UASRPS23(Rap1(sc)-Mcm1(WT))-HIS3::TRP1::DED1	this study
YAM52	S. cerevisiae	MATa his3∆1 leu2∆0 met15∆0 ura3∆0 rap1∆::hphMX4 (pRS416 UASRap1 FLAG3-RAP1) trp1∆::kanMX4 HA3-TAF1 (Scer)UASRPS23(Rap1(WT)-Mcm1(sc))-HIS3::TRP1::DED1	this study
YAM53	S. cerevisiae	MATa his3∆1 leu2∆0 met15∆0 ura3∆0 rap1∆::hphMX4 (pRS416 UASRap1 FLAG3-RAP1) trp1∆::kanMX4 HA3-TAF1 (Scer)UASRPS23(Rap1(sc)-Mcm1(sc))-HIS3::TRP1::DED1	this study
YAM54	S. cerevisiae	MATa his3∆1 leu2∆0 met15∆0 ura3∆0 rap1∆::hphMX4 (pRS416 UASRap1 FLAG3-RAP1) trp1∆::kanMX4 HA3-TAF1 (Scer)UASRPS23(Rap1(3T4A)-Mcm1(WT))-HIS3::TRP1::DED1	this study
YAM55	S. cerevisiae	MATa his3∆1 leu2∆0 met15∆0 ura3∆0 rap1∆::hphMX4 (pRS416 UASRap1 FLAG3-RAP1) trp1∆::kanMX4 HA3-TAF1 (Scer)UASRPS23(Rap1(3T4A)-Mcm1(sc))-HIS3::TRP1::DED1	this study
yLB72	K. lactis	MATa hmlα::ura3::natMX4 hmra::TRP1 nej1::LEU2 metA1	Sorrells et al (2015) Nature
yTS278	K. lactis	MATa hmlα::ura3::natMX4 hmra::TRP1 nej1::LEU2 metA1 trp1::(Klac)UASRPS23(Rap1(WT)-Mcm1(WT))-GFP::hphMX4	this study
yTS279	K. lactis	MATa hmlα::ura3::NatMX4 hmra::TRP1 nej1::LEU2 metA1 trp1::(Klac)UASRPS23(Rap1(WT)-Mcm1(sc))-GFP::hphMX4	this study
yTS280	K. lactis	MATa hmlα::ura3::NatMX4 hmra::TRP1 nej1::LEU2 metA1 trp1::(Klac)UASRPS23(Rap1(sc)-Mcm1(WT))-GFP::hphMX4	this study
yTS281	K. lactis	MATa hmlα::ura3::NatMX4 hmra::TRP1 nej1::LEU2 metA1 trp1::(Klac)UASRPS23(Rap1(sc)-Mcm1(sc))-GFP::hphMX4	this study
yTS285	K. lactis	MATa hmlα::ura3::NatMX4 hmra::TRP1 nej1::LEU2 metA1 trp1::(Klac)UASRPS18(Rap1(WT)-Mcm1(WT))-GFP::hphMX4	this study
yTS286	K. lactis	MATa hmlα::ura3::NatMX4 hmra::TRP1 nej1::LEU2 metA1 trp1::(Klac)UASRPS18(Rap1(WT)-Mcm1(sc))-GFP::hphMX4	this study
yTS287	K. lactis	MATa hmlα::ura3::NatMX4 hmra::TRP1 nej1::LEU2 metA1 trp1::(Klac)UASRPL37(Rap1(WT)-Mcm1(WT))-GFP::hphMX4	this study
yTS288	K. lactis	MATa hmlα::ura3::NatMX4 hmra::TRP1 nej1::LEU2 metA1 trp1::(Klac)UASRPL37(Rap1(WT)-Mcm1(sc))-GFP::hphMX4	this study
yTS283	S. cerevisiae	MATa	Hiten Madhani collection YM 3475
yTS293	S. cerevisiae	MATa trp1::(Scer)UASRPS23(Rap1(WT)-Mcm1(WT))-GFP::hphMX4	this study
yTS294	S. cerevisiae	MATa trp1::(Scer)UASRPS23(Rap1(WT)-Mcm1(sc))-GFP::hphMX4	this study
yTS295	S. cerevisiae	MATa trp1::(Scer)UASRPS23(Rap1(sc)-Mcm1(WT))-GFP::hphMX4	this study
yTS296	S. cerevisiae	MATa trp1::(Scer)UASRPS23(Rap1(sc)-Mcm1(sc))-GFP::hphMX4	this study
yTS347	K. lactis	K. lactis x K. wickerhamii yLB13a x yLB122	this study
yTS349	K. lactis	K. lactis x K. wickerhamii yLB13a x yLB121	this study
yTS352	K. lactis	K. lactis x K. marxianus yLB72 x CB63	this study
yTS353	K. lactis	K. lactis x K. wickerhamii yLB72 x yLB66c	this study
