# Supplementary material for: Intrinsic cooperativity potentiates parallel cis-regulatory evolution
Source: eLife. 2018 Sep 10;7:e37563. doi: 10.7554/eLife.37563 (PMC6173580; doi:10.7554/eLife.37563)
Supplement: Supplementary file 3. — The table indicates the genus and species, assembly version, and the publication or website from which the genome was obtained. [file elife-37563-supp3.xlsx]

## Sheet: genome info
genus	species	genome assembly/annotation	source
Acephala	macrosclerotiorum	Acema1	Joint Genomics Institute of the US Department of Energy (http://jgi.doe.gov)
Acidomyces	richmondensis	Aciri1_meta	Mosier, A. C., Miller, C. S., Frischkorn, K. R., Ohm, R. A., Li, Z., LaButti, K., et al. (2016). Fungi Contribute Critical but Spatially Varying Roles in Nitrogen and Carbon Cycling in Acid Mine Drainage. Frontiers in Microbiology, 7, 238. http://doi.org/10.3389/fmicb.2016.00238
Alternaria	alternata	Altal1	Zeiner, C. A., Purvine, S. O., Zink, E. M., Paša-Tolić, L., Chaput, D. L., Haridas, S., et al. (2016). Comparative Analysis of Secretome Profiles of Manganese(II)-Oxidizing Ascomycete Fungi. PloS One, 11(7), e0157844. http://doi.org/10.1371/journal.pone.0157844
Anthostoma	avocetta	Antav1	Joint Genomics Institute of the US Department of Energy (http://jgi.doe.gov)
Arthroascus	fermentans	Artfe1_2	Joint Genomics Institute of the US Department of Energy (http://jgi.doe.gov)
Arthrobotrys	oligospora	Artol1	Yang, J., Wang, L., Ji, X., Feng, Y., Li, X., Zou, C., et al. (2011). Genomic and proteomic analyses of the fungus Arthrobotrys oligospora provide insights into nematode-trap formation. PLoS Pathogens, 7(9), e1002179. http://doi.org/10.1371/journal.ppat.1002179
Arthroderma	benhamiae	Artbe1	Burmester, A., Shelest, E., Glöckner, G., Heddergott, C., Schindler, S., Staib, P., et al. (2011). Comparative and functional genomics provide insights into the pathogenicity of dermatophytic fungi. Genome Biology, 12(1), R7. http://doi.org/10.1186/gb-2011-12-1-r7
Arxula	adeninivorans	Arxad1	Kunze, G., Gaillardin, C., Czernicka, M., Durrens, P., Martin, T., Böer, E., et al. (2014). The complete genome of Blastobotrys (Arxula) adeninivorans LS3 - a yeast of biotechnological interest. Biotechnology for Biofuels, 7, 66. http://doi.org/10.1186/1754-6834-7-66
Ascobolus	immersus	Ascim1	Joint Genomics Institute of the US Department of Energy (http://jgi.doe.gov)
Ascocoryne	sarcoides	Ascsa1	Gianoulis, T. A., Griffin, M. A., Spakowicz, D. J., Dunican, B. F., Alpha, C. J., Sboner, A., et al. (2012). Genomic Analysis of the Hydrocarbon-Producing, Cellulolytic, Endophytic Fungus Ascocoryne sarcoides. PLoS Genetics, 8(3), e1002558. http://doi.org/10.1371/journal.pgen.1002558
Ascodesmis	nigricans	Ascni1	Joint Genomics Institute of the US Department of Energy (http://jgi.doe.gov)
Ascoidea	rubescens	Ascru1	Riley, R., Haridas, S., Wolfe, K. H., Lopes, M. R., Hittinger, C. T., Göker, M., et al. (2016). Comparative genomics of biotechnologically important yeasts. Proceedings of the National Academy of Sciences, 113(35), 9882–9887. http://doi.org/10.1073/pnas.1603941113
Aspergillus	fumigatus	Aspfu_A1163_1	Fedorova, N. D., Khaldi, N., Joardar, V. S., Maiti, R., Amedeo, P., Anderson, M. J., et al. (2008). Genomic islands in the pathogenic filamentous fungus Aspergillus fumigatus. PLoS Genetics, 4(4), e1000046. http://doi.org/10.1371/journal.pgen.1000046
Aspergillus	nidulans	Aspnid1	Arnaud, M. B., Cerqueira, G. C., Inglis, D. O., Skrzypek, M. S., Binkley, J., Chibucos, M. C., et al. (2012). The Aspergillus Genome Database (AspGD): recent developments in comprehensive multispecies curation, comparative genomics and community resources. Nucleic Acids Research, 40(Database issue), D653–9. http://doi.org/10.1093/nar/gkr875
Aureobasidium	melanogenum	Aurpu_var_mel1	Gostinčar, C., Ohm, R. A., Kogej, T., Sonjak, S., Turk, M., Zajc, J., et al. (2014). Genome sequencing of four Aureobasidium pullulans varieties: biotechnological potential, stress tolerance, and description of new species. BMC Genomics, 15, 549. http://doi.org/10.1186/1471-2164-15-549
Babjeviella	inositovora	Babin1	Riley, R., Haridas, S., Wolfe, K. H., Lopes, M. R., Hittinger, C. T., Göker, M., et al. (2016). Comparative genomics of biotechnologically important yeasts. Proceedings of the National Academy of Sciences, 113(35), 9882–9887. http://doi.org/10.1073/pnas.1603941113
Baudoinia	compniacensis	Bauco1	Ohm, R. A., Feau, N., Henrissat, B., Schoch, C. L., Horwitz, B. A., Barry, K. W., et al. (2012). Diverse lifestyles and strategies of plant pathogenesis encoded in the genomes of eighteen Dothideomycetes fungi. PLoS Pathogens, 8(12), e1003037. http://doi.org/10.1371/journal.ppat.1003037
Beauveria	bassiana	Beaba1	Xiao, G., Ying, S.-H., Zheng, P., Wang, Z.-L., Zhang, S., Xie, X.-Q., et al. (2012). Genomic perspectives on the evolution of fungal entomopathogenicity in Beauveria bassiana. Scientific Reports, 2, 483. http://doi.org/10.1038/srep00483
Blastomyces	dermatitidis	Blade1	Muñoz, J. F., Gauthier, G. M., Desjardins, C. A., Gallo, J. E., Holder, J., Sullivan, T. D., et al. (2015). The Dynamic Genome and Transcriptome of the Human Fungal Pathogen Blastomyces and Close Relative Emmonsia. PLoS Genetics, 11(10), e1005493. http://doi.org/10.1371/journal.pgen.1005493
Blumeria	graminis	Blugr1	Wicker, T., Oberhaensli, S., Parlange, F., Buchmann, J. P., Shatalina, M., Roffler, S., et al. (2013). The wheat powdery mildew genome shows the unique evolution of an obligate biotroph. Nature Genetics, 45(9), 1092–1096. http://doi.org/10.1038/ng.2704
Botryosphaeria	dothidea	Botdo1_1	Joint Genomics Institute of the US Department of Energy (http://jgi.doe.gov)
Botrytis	cinerea	Botci1	Amselem, J., Cuomo, C. A., van Kan, J. A. L., Viaud, M., Benito, E. P., Couloux, A., et al. (2011). Genomic analysis of the necrotrophic fungal pathogens Sclerotinia sclerotiorum and Botrytis cinerea. PLoS Genetics, 7(8), e1002230. http://doi.org/10.1371/journal.pgen.1002230
Candida	albicans	CGOB v2.0	Maguire, S. L., ÓhÉigeartaigh, S. S., Byrne, K. P., Schröder, M. S., O'Gaora, P., Wolfe, K. H., & Butler, G. (2013). Comparative Genome Analysis and Gene Finding in Candida Species Using CGOB. Molecular Biology and Evolution, 30(6), 1281–1291. http://doi.org/10.1093/molbev/mst042
Candida	arabinofermentans	Canar1	Riley, R., Haridas, S., Wolfe, K. H., Lopes, M. R., Hittinger, C. T., Göker, M., et al. (2016). Comparative genomics of biotechnologically important yeasts. Proceedings of the National Academy of Sciences, 113(35), 9882–9887. http://doi.org/10.1073/pnas.1603941113
Candida	bracarensis	Cbra_v1.3	Gabaldón, T., Martin, T., Marcet-Houben, M., Durrens, P., Bolotin-Fukuhara, M., Lespinet, O., et al. (2013). Comparative genomics of emerging pathogens in the Candida glabrata clade. BMC Genomics, 14(1), 623. http://doi.org/10.1186/1471-2164-14-625
Candida	caseinolytica	Canca1	Riley, R., Haridas, S., Wolfe, K. H., Lopes, M. R., Hittinger, C. T., Göker, M., et al. (2016). Comparative genomics of biotechnologically important yeasts. Proceedings of the National Academy of Sciences, 113(35), 9882–9887. http://doi.org/10.1073/pnas.1603941113
Candida	cstellii	Ccst_v1.3	Gabaldón, T., Martin, T., Marcet-Houben, M., Durrens, P., Bolotin-Fukuhara, M., Lespinet, O., et al. (2013). Comparative genomics of emerging pathogens in the Candida glabrata clade. BMC Genomics, 14(1), 623. http://doi.org/10.1186/1471-2164-14-626
Candida	dubliniensis	CGOB v2.0	Maguire, S. L., ÓhÉigeartaigh, S. S., Byrne, K. P., Schröder, M. S., O'Gaora, P., Wolfe, K. H., & Butler, G. (2013). Comparative Genome Analysis and Gene Finding in Candida Species Using CGOB. Molecular Biology and Evolution, 30(6), 1281–1291. http://doi.org/10.1093/molbev/mst042
Candida	glabrata	YGOB v7	Byrne, K. P., & Wolfe, K. H. (2005). The Yeast Gene Order Browser: Combining curated homology and syntenic context reveals gene fate in polyploid species. Genome Research, 15(10), 1456–1461. http://doi.org/10.1101/gr.3672309
Meyerozyma	guilliermondii	CGOB v2.0	Maguire, S. L., ÓhÉigeartaigh, S. S., Byrne, K. P., Schröder, M. S., O'Gaora, P., Wolfe, K. H., & Butler, G. (2013). Comparative Genome Analysis and Gene Finding in Candida Species Using CGOB. Molecular Biology and Evolution, 30(6), 1281–1291. http://doi.org/10.1093/molbev/mst042
Candida	nivarensis	Cniv_v1.3	Gabaldón, T., Martin, T., Marcet-Houben, M., Durrens, P., Bolotin-Fukuhara, M., Lespinet, O., et al. (2013). Comparative genomics of emerging pathogens in the Candida glabrata clade. BMC Genomics, 14(1), 623. http://doi.org/10.1186/1471-2164-14-623
Candida	parapsilosis	CGOB v2.0	Maguire, S. L., ÓhÉigeartaigh, S. S., Byrne, K. P., Schröder, M. S., O'Gaora, P., Wolfe, K. H., & Butler, G. (2013). Comparative Genome Analysis and Gene Finding in Candida Species Using CGOB. Molecular Biology and Evolution, 30(6), 1281–1291. http://doi.org/10.1093/molbev/mst042
Candida	tanzawaensis	Canta1	Riley, R., Haridas, S., Wolfe, K. H., Lopes, M. R., Hittinger, C. T., Göker, M., et al. (2016). Comparative genomics of biotechnologically important yeasts. Proceedings of the National Academy of Sciences, 113(35), 9882–9887. http://doi.org/10.1073/pnas.1603941113
Candida	tenuis	Cante1	Riley, R., Haridas, S., Wolfe, K. H., Lopes, M. R., Hittinger, C. T., Göker, M., et al. (2016). Comparative genomics of biotechnologically important yeasts. Proceedings of the National Academy of Sciences, 113(35), 9882–9887. http://doi.org/10.1073/pnas.1603941113
Candida	tropicalis	CGOB v2.0	Maguire, S. L., ÓhÉigeartaigh, S. S., Byrne, K. P., Schröder, M. S., O'Gaora, P., Wolfe, K. H., & Butler, G. (2013). Comparative Genome Analysis and Gene Finding in Candida Species Using CGOB. Molecular Biology and Evolution, 30(6), 1281–1291. http://doi.org/10.1093/molbev/mst042
Cenococcum	geophilum	Cenge3	Peter, M., Kohler, A., Ohm, R. A., Kuo, A., Krützmann, J., Morin, E., et al. (2016). Ectomycorrhizal ecology is imprinted in the genome of the dominant symbiotic fungus Cenococcum geophilum. Nature Communications, 7, 12662. http://doi.org/10.1038/ncomms12662
Cephaloascus	albidus	Cepal1_1	Joint Genomics Institute of the US Department of Energy (http://jgi.doe.gov)
Cephaloascus	fragrans	Cepfr1_1	Joint Genomics Institute of the US Department of Energy (http://jgi.doe.gov)
Cladonia	grayi	Clagr3	McDonald, T. R., Mueller, O., Dietrich, F. S., & Lutzoni, F. (2013). High-throughput genome sequencing of lichenizing fungi to assess gene loss in the ammonium transporter/ammonia permease gene family. BMC Genomics, 14(1), 225. http://doi.org/10.1186/1471-2164-14-225
Cladosporium	fulvum	Clafu1	de Wit, P. J. G. M., van der Burgt, A., Ökmen, B., Stergiopoulos, I., Abd-Elsalam, K. A., Aerts, A. L., et al. (2012). The Genomes of the Fungal Plant Pathogens Cladosporium fulvum and Dothistroma septosporum Reveal Adaptation to Different Hosts and Lifestyles But Also Signatures of Common Ancestry. PLoS Genetics, 8(11), e1003088. http://doi.org/10.1371/journal.pgen.1003088
Clavispora	lusitaniae	CGOB v2.0	Maguire, S. L., ÓhÉigeartaigh, S. S., Byrne, K. P., Schröder, M. S., O'Gaora, P., Wolfe, K. H., & Butler, G. (2013). Comparative Genome Analysis and Gene Finding in Candida Species Using CGOB. Molecular Biology and Evolution, 30(6), 1281–1291. http://doi.org/10.1093/molbev/mst042
Coccidioides	immitis	Cocim1	Sharpton, T. J., Stajich, J. E., Rounsley, S. D., Gardner, M. J., Wortman, J. R., Jordar, V. S., et al. (2009). Comparative genomic analyses of the human fungal pathogens Coccidioides and their relatives. Genome Research. http://doi.org/10.1101/gr.087551.108
Colletotrichum	caudatum	Colca1	Joint Genomics Institute of the US Department of Energy (http://jgi.doe.gov)
Cordyceps	militaris	Cormi1	Zheng, P., Xia, Y., Xiao, G., Xiong, C., Hu, X., Zhang, S., et al. (2011). Genome sequence of the insect pathogenic fungus Cordyceps militaris, a valued traditional Chinese medicine. Genome Biology, 12(11), R116. http://doi.org/10.1186/gb-2011-12-11-r116
Cyberlindnera	jadinii	Cybja1	Riley, R., Haridas, S., Wolfe, K. H., Lopes, M. R., Hittinger, C. T., Göker, M., et al. (2016). Comparative genomics of biotechnologically important yeasts. Proceedings of the National Academy of Sciences, 113(35), 9882–9887. http://doi.org/10.1073/pnas.1603941113
Debaromyces	hansenii	CGOB v2.0	Maguire, S. L., ÓhÉigeartaigh, S. S., Byrne, K. P., Schröder, M. S., O'Gaora, P., Wolfe, K. H., & Butler, G. (2013). Comparative Genome Analysis and Gene Finding in Candida Species Using CGOB. Molecular Biology and Evolution, 30(6), 1281–1291. http://doi.org/10.1093/molbev/mst042
Dekkera	bruxellensis	Dekbr2	The genome of wine yeast Dekkera bruxellensis provides a tool to explore its food-related properties. (2012). 157(2), 202–209. http://doi.org/10.1016/j.ijfoodmicro.2012.05.008
Diaporthe	ampelina	Diaam1	Morales-Cruz, A., Amrine, K. C. H., Blanco-Ulate, B., Lawrence, D. P., Travadon, R., Rolshausen, P. E., et al. (2015). Distinctive expansion of gene families associated with plant cell wall degradation, secondary metabolism, and nutrient uptake in the genomes of grapevine trunk pathogens. BMC Genomics, 16, 469. http://doi.org/10.1186/s12864-015-1624-z
Diplodia	seriata	Dipse1	Morales-Cruz, A., Amrine, K. C. H., Blanco-Ulate, B., Lawrence, D. P., Travadon, R., Rolshausen, P. E., et al. (2015). Distinctive expansion of gene families associated with plant cell wall degradation, secondary metabolism, and nutrient uptake in the genomes of grapevine trunk pathogens. BMC Genomics, 16, 469. http://doi.org/10.1186/s12864-015-1624-z
Dothistroma	septosporum	Dotse1	de Wit, P. J. G. M., van der Burgt, A., Ökmen, B., Stergiopoulos, I., Abd-Elsalam, K. A., Aerts, A. L., et al. (2012). The Genomes of the Fungal Plant Pathogens Cladosporium fulvum and Dothistroma septosporum Reveal Adaptation to Different Hosts and Lifestyles But Also Signatures of Common Ancestry. PLoS Genetics, 8(11), e1003088. http://doi.org/10.1371/journal.pgen.1003088
Eremothecium	cymbalariae	YGOB v7	Byrne, K. P., & Wolfe, K. H. (2005). The Yeast Gene Order Browser: Combining curated homology and syntenic context reveals gene fate in polyploid species. Genome Research, 15(10), 1456–1461. http://doi.org/10.1101/gr.3672309
Eremothecium	gossypii	YGOB v7	Byrne, K. P., & Wolfe, K. H. (2005). The Yeast Gene Order Browser: Combining curated homology and syntenic context reveals gene fate in polyploid species. Genome Research, 15(10), 1456–1461. http://doi.org/10.1101/gr.3672309
Eurotium	rubrum	Eurhe1	Kis-Papo, T., Weig, A. R., Riley, R., Peršoh, D., Salamov, A., Sun, H., et al. (2014). Genomic adaptations of the halophilic Dead Sea filamentous fungus Eurotium rubrum. Nature Communications, 5, 3745. http://doi.org/10.1038/ncomms4745
Exophiala	dermatitidis	Exode1	Chen, Z., Martinez, D. A., Gujja, S., Sykes, S. M., Zeng, Q., Szaniszlo, P. J., et al. (2014). Comparative genomic and transcriptomic analysis of wangiella dermatitidis, a major cause of phaeohyphomycosis and a model black yeast human pathogen. G3 (Bethesda, Md.), 4(4), 561–578. http://doi.org/10.1534/g3.113.009241
Fusarium	graminearum	Fusgr1	Cuomo, C. A., Güldener, U., Xu, J.-R., Trail, F., Turgeon, B. G., Di Pietro, A., et al. (2007). The Fusarium graminearum Genome Reveals a Link Between Localized Polymorphism and Pathogen Specialization. Science (New York, NY), 317(5843), 1400–1402. http://doi.org/10.1126/science.1143708
Gaeumannomyces	graminis	Gaegr1	Okagaki, L. H., Nunes, C. C., Sailsbery, J., Clay, B., Brown, D., John, T., et al. (2015). Genome Sequences of Three Phytopathogenic Species of the Magnaporthaceae Family of Fungi. G3 (Bethesda, Md.), 5(12), 2539–2545. http://doi.org/10.1534/g3.115.020057
Glarea	lozoyensis	Glalo1	Chen, L., Yue, Q., Zhang, X., Xiang, M., Wang, C., Li, S., et al. (2013). Genomics-driven discovery of the pneumocandin biosynthetic gene cluster in the fungus Glarea lozoyensis. BMC Genomics, 14(1), 339. http://doi.org/10.1186/1471-2164-14-339
Grosmannia	clavigera	Grocl1	DiGuistini, S., Wang, Y., Liao, N. Y., Taylor, G., Tanguay, P., Feau, N., et al. (2011). Genome and transcriptome analyses of the mountain pine beetle-fungal symbiont Grosmannia clavigera, a lodgepole pine pathogen. Proceedings of the National Academy of Sciences, 108(6), 2504–2509. http://doi.org/10.1073/pnas.1011289108
Hanseniaspora	uvarum	APLS01000000	European Nucleotide Archive (https://www.ebi.ac.uk/ena)
Hanseniaspora	valbyensis	Hanva1_1	Riley, R., Haridas, S., Wolfe, K. H., Lopes, M. R., Hittinger, C. T., Göker, M., et al. (2016). Comparative genomics of biotechnologically important yeasts. Proceedings of the National Academy of Sciences, 113(35), 9882–9887. http://doi.org/10.1073/pnas.1603941113
Hanseniaspora	vineae	JFAV02000000	Giorello, F. M., Berná, L., Greif, G., Camesasca, L., Salzman, V., Medina, K., et al. (2014). Genome Sequence of the Native Apiculate Wine Yeast Hanseniaspora vineae T02/19AF. Genome Announcements, 2(3), e00530–14–e00530–14. http://doi.org/10.1128/genomeA.00530-14
Hansenula	polymorpha	Hanpo2	Riley, R., Haridas, S., Wolfe, K. H., Lopes, M. R., Hittinger, C. T., Göker, M., et al. (2016). Comparative genomics of biotechnologically important yeasts. Proceedings of the National Academy of Sciences, 113(35), 9882–9887. http://doi.org/10.1073/pnas.1603941113
Histoplasma	capsulatum	Hisca1	Sharpton, T. J., Stajich, J. E., Rounsley, S. D., Gardner, M. J., Wortman, J. R., Jordar, V. S., et al. (2009). Comparative genomic analyses of the human fungal pathogens Coccidioides and their relatives. Genome Research. http://doi.org/10.1101/gr.087551.108
Hyphopichia	burtonii	Hypbu1	Riley, R., Haridas, S., Wolfe, K. H., Lopes, M. R., Hittinger, C. T., Göker, M., et al. (2016). Comparative genomics of biotechnologically important yeasts. Proceedings of the National Academy of Sciences, 113(35), 9882–9887. http://doi.org/10.1073/pnas.1603941113
Hysterium	pulicare	Hyspu1_1	Ohm, R. A., Feau, N., Henrissat, B., Schoch, C. L., Horwitz, B. A., Barry, K. W., et al. (2012). Diverse lifestyles and strategies of plant pathogenesis encoded in the genomes of eighteen Dothideomycetes fungi. PLoS Pathogens, 8(12), e1003037. http://doi.org/10.1371/journal.ppat.1003037
Ilyonectria	sp.	Ilysp1	Joint Genomics Institute of the US Department of Energy (http://jgi.doe.gov)
Kazachstania	africana	YGOB v7	Byrne, K. P., & Wolfe, K. H. (2005). The Yeast Gene Order Browser: Combining curated homology and syntenic context reveals gene fate in polyploid species. Genome Research, 15(10), 1456–1461. http://doi.org/10.1101/gr.3672309
Kazachstania	naganishii	YGOB v7	Byrne, K. P., & Wolfe, K. H. (2005). The Yeast Gene Order Browser: Combining curated homology and syntenic context reveals gene fate in polyploid species. Genome Research, 15(10), 1456–1461. http://doi.org/10.1101/gr.3672309
Kluyveromyces	aestuarii	AEAS00000000	Baker, C. R., Tuch, B. B., & Johnson, A. D. (2011). Extensive DNA-binding specificity divergence of a conserved transcription regulator. Proceedings of the National Academy of Sciences of the United States of America, 108(18), 7493–7498. http://doi.org/10.1073/pnas.1019177108
Kluyveromyces	dobzhanskii	GCA_000820885.1	NCBI Assembly archive (https://www.ncbi.nlm.nih.gov/assembly/)
Kluyveromyces	lactis	YGOB v7	Byrne, K. P., & Wolfe, K. H. (2005). The Yeast Gene Order Browser: Combining curated homology and syntenic context reveals gene fate in polyploid species. Genome Research, 15(10), 1456–1461. http://doi.org/10.1101/gr.3672309
Kluyveromyces	marxianus	ASM74778v1	Suzuki, T., Hoshino, T., & Matsushika, A. (2014). Draft Genome Sequence of Kluyveromyces marxianus Strain DMB1, Isolated from Sugarcane Bagasse Hydrolysate. Genome Announcements, 2(4). http://doi.org/10.1128/genomeA.00733-14
Kluyveromyces	wickerhamii	AEAV00000000	Baker, C. R., Tuch, B. B., & Johnson, A. D. (2011). Extensive DNA-binding specificity divergence of a conserved transcription regulator. Proceedings of the National Academy of Sciences of the United States of America, 108(18), 7493–7498. http://doi.org/10.1073/pnas.1019177108
Kuraishia	capsulata	Kurca1	Morales, L., Noel, B., Porcel, B., Marcet-Houben, M., Hullo, M.-F., Sacerdot, C., et al. (2013). Complete DNA sequence of Kuraishia capsulata illustrates novel genomic features among budding yeasts (Saccharomycotina). Genome Biology and Evolution, 5(12), 2524–2539. http://doi.org/10.1093/gbe/evt201
Lachancea	kluyveri	YGOB v7	Byrne, K. P., & Wolfe, K. H. (2005). The Yeast Gene Order Browser: Combining curated homology and syntenic context reveals gene fate in polyploid species. Genome Research, 15(10), 1456–1461. http://doi.org/10.1101/gr.3672309
Lachancea	thermotolerans	YGOB v7	Byrne, K. P., & Wolfe, K. H. (2005). The Yeast Gene Order Browser: Combining curated homology and syntenic context reveals gene fate in polyploid species. Genome Research, 15(10), 1456–1461. http://doi.org/10.1101/gr.3672309
Lachancea	waltii	YGOB v7	Byrne, K. P., & Wolfe, K. H. (2005). The Yeast Gene Order Browser: Combining curated homology and syntenic context reveals gene fate in polyploid species. Genome Research, 15(10), 1456–1461. http://doi.org/10.1101/gr.3672309
Leptosphaeria	maculans	Lepmu1	Rouxel, T., Grandaubert, J., Hane, J. K., Hoede, C., van de Wouw, A. P., Couloux, A., et al. (2011). Effector diversification within compartments of the Leptosphaeria maculans genome affected by Repeat-Induced Point mutations. Nature Communications, 2, 202. http://doi.org/10.1038/ncomms1189
Lipomyces	starkeyi	Lipst1_1	Riley, R., Haridas, S., Wolfe, K. H., Lopes, M. R., Hittinger, C. T., Göker, M., et al. (2016). Comparative genomics of biotechnologically important yeasts. Proceedings of the National Academy of Sciences, 113(35), 9882–9887. http://doi.org/10.1073/pnas.1603941113
Lodderomyces	elongisporus	CGOB v2.0	Maguire, S. L., ÓhÉigeartaigh, S. S., Byrne, K. P., Schröder, M. S., O'Gaora, P., Wolfe, K. H., & Butler, G. (2013). Comparative Genome Analysis and Gene Finding in Candida Species Using CGOB. Molecular Biology and Evolution, 30(6), 1281–1291. http://doi.org/10.1093/molbev/mst042
Lollipopaia	minuta	Lolmi1	Joint Genomics Institute of the US Department of Energy (http://jgi.doe.gov)
Macrophomina	phaseolina	Macph1	Islam, M. S., Haque, M. S., Islam, M. M., Emdad, E. M., Halim, A., Hossen, Q. M. M., et al. (2012). Tools to kill: genome of one of the most destructive plant pathogenic fungi Macrophomina phaseolina. BMC Genomics, 13(1), 493. http://doi.org/10.1186/1471-2164-13-493
Magnaporthe	grisea	Maggr1	Dean, R. A., Talbot, N. J., Ebbole, D. J., Farman, M. L., Mitchell, T. K., Orbach, M. J., et al. (2005). The genome sequence of the rice blast fungus <i>Magnaporthe grisea</i>. Nature, 434(7036), 980. http://doi.org/10.1038/nature03449
Marssonina	brunnea	Marbr1	Zhu, S., Cao, Y.-Z., Jiang, C., Tan, B.-Y., Wang, Z., Feng, S., et al. (2012). Sequencing the genome of Marssonina brunnea reveals fungus-poplar co-evolution. BMC Genomics, 13(1), 382. http://doi.org/10.1186/1471-2164-13-382
Metarhizium	acridum	Metac1	Gao, Q., Jin, K., Ying, S.-H., Zhang, Y., Xiao, G., Shang, Y., et al. (2011). Genome Sequencing and Comparative Transcriptomics of the Model Entomopathogenic Fungi Metarhizium anisopliae and M. acridum. PLoS Genetics, 7(1), e1001264. http://doi.org/10.1371/journal.pgen.1001264
Metschnikowia	bicuspidata	Metbi1	Riley, R., Haridas, S., Wolfe, K. H., Lopes, M. R., Hittinger, C. T., Göker, M., et al. (2016). Comparative genomics of biotechnologically important yeasts. Proceedings of the National Academy of Sciences, 113(35), 9882–9887. http://doi.org/10.1073/pnas.1603941113
Microsporum	canis	Micca1	Martinez, D. A., Oliver, B. G., Gräser, Y., Goldberg, J. M., Li, W., Martinez-Rossi, N. M., et al. (2012). Comparative Genome Analysis of Trichophyton rubrum and Related Dermatophytes Reveals Candidate Genes Involved in Infection. mBio, 3(5), e00259–12. http://doi.org/10.1128/mBio.00259-12
Monacrosporium	haptotylum	Monha1	Meerupati, T., Andersson, K.-M., Friman, E., Kumar, D., Tunlid, A., & Ahrén, D. (2013). Genomic mechanisms accounting for the adaptation to parasitism in nematode-trapping fungi. PLoS Genetics, 9(11), e1003909. http://doi.org/10.1371/journal.pgen.1003909
Monascus	purpureus	Monpu1	Joint Genomics Institute of the US Department of Energy (http://jgi.doe.gov)
Myceliophthora	thermophila	Spoth2	Berka, R. M., Grigoriev, I. V., Otillar, R., Salamov, A., Grimwood, J., Reid, I., et al. (2011). Comparative genomic analysis of the thermophilic biomass-degrading fungi <i>Myceliophthora thermophila</i> and <i>Thielavia terrestris</i>. Nature Biotechnology, 29(10), 922. http://doi.org/10.1038/nbt.1976
Mycosphaerella	graminicola	Mycgr3	Goodwin, S. B., Ben M'Barek, S., Dhillon, B., Wittenberg, A. H. J., Crane, C. F., Hane, J. K., et al. (2011). Finished Genome of the Fungal Wheat Pathogen Mycosphaerella graminicola Reveals Dispensome Structure, Chromosome Plasticity, and Stealth Pathogenesis. PLoS Genetics, 7(6), e1002070. http://doi.org/10.1371/journal.pgen.1002070
Nadsonia	fulvescens	Nadfu1	Riley, R., Haridas, S., Wolfe, K. H., Lopes, M. R., Hittinger, C. T., Göker, M., et al. (2016). Comparative genomics of biotechnologically important yeasts. Proceedings of the National Academy of Sciences, 113(35), 9882–9887. http://doi.org/10.1073/pnas.1603941113
Nakaseomyces	bacillisporus	Nbac_v1.3	Gabaldón, T., Martin, T., Marcet-Houben, M., Durrens, P., Bolotin-Fukuhara, M., Lespinet, O., et al. (2013). Comparative genomics of emerging pathogens in the Candida glabrata clade. BMC Genomics, 14(1), 623. http://doi.org/10.1186/1471-2164-14-627
Nakaseomyces	delphensis	Ndel_v1.3	Gabaldón, T., Martin, T., Marcet-Houben, M., Durrens, P., Bolotin-Fukuhara, M., Lespinet, O., et al. (2013). Comparative genomics of emerging pathogens in the Candida glabrata clade. BMC Genomics, 14(1), 623. http://doi.org/10.1186/1471-2164-14-624
Naumovozyma	castellii	YGOB v7	Byrne, K. P., & Wolfe, K. H. (2005). The Yeast Gene Order Browser: Combining curated homology and syntenic context reveals gene fate in polyploid species. Genome Research, 15(10), 1456–1461. http://doi.org/10.1101/gr.3672309
Naumovozyma	dairenensis	YGOB v7	Byrne, K. P., & Wolfe, K. H. (2005). The Yeast Gene Order Browser: Combining curated homology and syntenic context reveals gene fate in polyploid species. Genome Research, 15(10), 1456–1461. http://doi.org/10.1101/gr.3672309
Neofusicoccum	parvum	Neopa1	Blanco-Ulate, B., Rolshausen, P., & Cantu, D. (2013). Draft Genome Sequence of Neofusicoccum parvum Isolate UCR-NP2, a Fungal Vascular Pathogen Associated with Grapevine Cankers. Genome Announcements, 1(3), e00339–13. http://doi.org/10.1128/genomeA.00339-13
Neosartorya	fischeri	Neofi1	Arnaud, M. B., Cerqueira, G. C., Inglis, D. O., Skrzypek, M. S., Binkley, J., Chibucos, M. C., et al. (2012). The Aspergillus Genome Database (AspGD): recent developments in comprehensive multispecies curation, comparative genomics and community resources. Nucleic Acids Research, 40(Database issue), D653–9. http://doi.org/10.1093/nar/gkr875
Neurospora	crassa	Neucr2	Galagan, J. E., Calvo, S. E., Borkovich, K. A., Nature, E. S., 2003. (n.d.). The genome sequence of the filamentous fungus Neurospora crassa | Nature. Nature.com.
Oidiodendron	maius	Oidma1	Kohler, A., Kuo, A., Nagy, L. G., Morin, E., Barry, K. W., Buscot, F., et al. (2015). Convergent losses of decay mechanisms and rapid turnover of symbiosis genes in mycorrhizal mutualists. Nature Genetics, 47(4), 410–415. http://doi.org/10.1038/ng.3223
Ophiostoma	piceae	Ophpic1	Haridas, S., Wang, Y., Lim, L., Alamouti, S. M., Jackman, S., Docking, R., et al. (2013). The genome and transcriptome of the pine saprophyte Ophiostoma piceae , and a comparison with the bark beetle-associated pine pathogen Grosmannia clavigera. BMC Genomics, 14(1), 373. http://doi.org/10.1186/1471-2164-14-373
Pachysolen	tannophilus	Pacta1_2	Riley, R., Haridas, S., Wolfe, K. H., Lopes, M. R., Hittinger, C. T., Göker, M., et al. (2016). Comparative genomics of biotechnologically important yeasts. Proceedings of the National Academy of Sciences, 113(35), 9882–9887. http://doi.org/10.1073/pnas.1603941113
Paracoccidioides	brasiliensis	Parbr1	Desjardins, C. A., Champion, M. D., Holder, J. W., Muszewska, A., Goldberg, J., Bailão, A. M., et al. (2011). Comparative Genomic Analysis of Human Fungal Pathogens Causing Paracoccidioidomycosis. PLoS Genetics, 7(10), e1002345. http://doi.org/10.1371/journal.pgen.1002345
Paraconiothyrium	sporulosum	Parsp1	Zeiner, C. A., Purvine, S. O., Zink, E. M., Paša-Tolić, L., Chaput, D. L., Haridas, S., et al. (2016). Comparative Analysis of Secretome Profiles of Manganese(II)-Oxidizing Ascomycete Fungi. PloS One, 11(7), e0157844. http://doi.org/10.1371/journal.pone.0157844
Penicillium	chrysogenum	PenchWisc1_1	van den Berg, M. A., Albang, R., Albermann, K., Badger, J. H., Daran, J.-M., Driessen, A. J. M., et al. (2008). Genome sequencing and analysis of the filamentous fungus <i>Penicillium chrysogenum</i>. Nature Biotechnology, 26(10), 1161. http://doi.org/10.1038/nbt.1498
Penicillium	oxalicum	Penox1	Liu, G., Zhang, L., Wei, X., Zou, G., Qin, Y., Ma, L., et al. (2013). Genomic and secretomic analyses reveal unique features of the lignocellulolytic enzyme system of Penicillium decumbens. PloS One, 8(2), e55185. http://doi.org/10.1371/journal.pone.0055185
Phaeoacremonium	aleophilum	Phaal1	Blanco-Ulate, B., Rolshausen, P., & Cantu, D. (2013). Draft Genome Sequence of the Ascomycete Phaeoacremonium aleophilum Strain UCR-PA7, a Causal Agent of the Esca Disease Complex in Grapevines. Genome Announcements, 1(3), e00390–13. http://doi.org/10.1128/genomeA.00390-13
Phaeomoniella	chlamydospora	Phach1	Morales-Cruz, A., Amrine, K. C. H., Blanco-Ulate, B., Lawrence, D. P., Travadon, R., Rolshausen, P. E., et al. (2015). Distinctive expansion of gene families associated with plant cell wall degradation, secondary metabolism, and nutrient uptake in the genomes of grapevine trunk pathogens. BMC Genomics, 16, 469. http://doi.org/10.1186/s12864-015-1624-z
Phialocephala	scopiformis	Phisc1	Walker, A. K., Frasz, S. L., Seifert, K. A., Miller, J. D., Mondo, S. J., LaButti, K., et al. (2016). Full Genome of Phialocephala scopiformis DAOMC 229536, a Fungal Endophyte of Spruce Producing the Potent Anti-Insectan Compound Rugulosin. Genome Announcements, 4(1), e01768–15. http://doi.org/10.1128/genomeA.01768-15
Pichia	membranifaciens	Picme2	Riley, R., Haridas, S., Wolfe, K. H., Lopes, M. R., Hittinger, C. T., Göker, M., et al. (2016). Comparative genomics of biotechnologically important yeasts. Proceedings of the National Academy of Sciences, 113(35), 9882–9887. http://doi.org/10.1073/pnas.1603941113
Pichia	pastoris	Picpa1	De Schutter, K., Lin, Y.-C., Tiels, P., Van Hecke, A., Glinka, S., Weber-Lehmann, J., et al. (2009). Genome sequence of the recombinant protein production host Pichia pastoris. Nature Biotechnology, 27(6), 561–566. http://doi.org/10.1038/nbt.1544
Scheffersomyces	stipitis	CGOB v2.0	Maguire, S. L., ÓhÉigeartaigh, S. S., Byrne, K. P., Schröder, M. S., O'Gaora, P., Wolfe, K. H., & Butler, G. (2013). Comparative Genome Analysis and Gene Finding in Candida Species Using CGOB. Molecular Biology and Evolution, 30(6), 1281–1291. http://doi.org/10.1093/molbev/mst042
Pneumocystis	jirovecii	Pneji1	De novo assembly of the Pneumocystis jirovecii genome from a single bronchoalveolar lavage fluid specimen from a patient. (2012). 4(1), e00428–12. http://doi.org/10.1128/mBio.00428-12
Podospora	anserina	Podan2	Espagne, E., Lespinet, O., Malagnac, F., Da Silva, C., Jaillon, O., Porcel, B. M., et al. (2008). The genome sequence of the model ascomycete fungus Podospora anserina. Genome Biology, 9(5), R77. http://doi.org/10.1186/gb-2008-9-5-r77
Pyrenophora	teres f. teres	Pyrtt1	Ellwood, S. R., Liu, Z., Syme, R. A., Lai, Z., Hane, J. K., Keiper, F., et al. (2010). A first genome assembly of the barley fungal pathogen Pyrenophora teres f. teres. Genome Biology, 11(11), R109. http://doi.org/10.1186/gb-2010-11-11-r109
Pyronema	confluens	Pyrco1	Traeger, S., Altegoer, F., Freitag, M., Gabaldón, T., Kempken, F., Kumar, A., et al. (2013). The genome and development-dependent transcriptomes of Pyronema confluens: a window into fungal evolution. PLoS Genetics, 9(9), e1003820. http://doi.org/10.1371/journal.pgen.1003820
Rhystidhysteron	rufulum	Rhyru1_1	Ohm, R. A., Feau, N., Henrissat, B., Schoch, C. L., Horwitz, B. A., Barry, K. W., et al. (2012). Diverse lifestyles and strategies of plant pathogenesis encoded in the genomes of eighteen Dothideomycetes fungi. PLoS Pathogens, 8(12), e1003037. http://doi.org/10.1371/journal.ppat.1003037
Rutstroemia	firma	Rutfi1	Joint Genomics Institute of the US Department of Energy (http://jgi.doe.gov)
Saccharomyces	cerevisiae	YGOB v7	Byrne, K. P., & Wolfe, K. H. (2005). The Yeast Gene Order Browser: Combining curated homology and syntenic context reveals gene fate in polyploid species. Genome Research, 15(10), 1456–1461. http://doi.org/10.1101/gr.3672305
Saccharomyces	kudriavzevii	YGOB v7	Byrne, K. P., & Wolfe, K. H. (2005). The Yeast Gene Order Browser: Combining curated homology and syntenic context reveals gene fate in polyploid species. Genome Research, 15(10), 1456–1461. http://doi.org/10.1101/gr.3672307
Saccharomyces	mikatae	YGOB v7	Byrne, K. P., & Wolfe, K. H. (2005). The Yeast Gene Order Browser: Combining curated homology and syntenic context reveals gene fate in polyploid species. Genome Research, 15(10), 1456–1461. http://doi.org/10.1101/gr.3672306
Saccharomyces	uvarum	YGOB v7	Byrne, K. P., & Wolfe, K. H. (2005). The Yeast Gene Order Browser: Combining curated homology and syntenic context reveals gene fate in polyploid species. Genome Research, 15(10), 1456–1461. http://doi.org/10.1101/gr.3672308
Saitoella	complicata	Saico1	Riley, R., Haridas, S., Wolfe, K. H., Lopes, M. R., Hittinger, C. T., Göker, M., et al. (2016). Comparative genomics of biotechnologically important yeasts. Proceedings of the National Academy of Sciences, 113(35), 9882–9887. http://doi.org/10.1073/pnas.1603941113
Sarcoscypha	coccinea	Sarco1	Joint Genomics Institute of the US Department of Energy (http://jgi.doe.gov)
Schizosaccharomyces	cryophilus	Schcy1	Rhind, N., Chen, Z., Yassour, M., Thompson, D. A., Haas, B. J., Habib, N., et al. (2011). Comparative functional genomics of the fission yeasts. Science (New York, NY), 332(6032), 930–936. http://doi.org/10.1126/science.1203357
Schizosaccharomyces	japonicus	Schja1	Rhind, N., Chen, Z., Yassour, M., Thompson, D. A., Haas, B. J., Habib, N., et al. (2011). Comparative functional genomics of the fission yeasts. Science (New York, NY), 332(6032), 930–936. http://doi.org/10.1126/science.1203357
Schizosaccharomyces	octosporus	Schoc1	Rhind, N., Chen, Z., Yassour, M., Thompson, D. A., Haas, B. J., Habib, N., et al. (2011). Comparative functional genomics of the fission yeasts. Science (New York, NY), 332(6032), 930–936. http://doi.org/10.1126/science.1203357
Schizosaccharomyces	pombe	Schpo1	Rhind, N., Chen, Z., Yassour, M., Thompson, D. A., Haas, B. J., Habib, N., et al. (2011). Comparative functional genomics of the fission yeasts. Science (New York, NY), 332(6032), 930–936. http://doi.org/10.1126/science.1203357
Sclerotinia	sclerotiorum	Sclsc1	Amselem, J., Cuomo, C. A., van Kan, J. A. L., Viaud, M., Benito, E. P., Couloux, A., et al. (2011). Genomic analysis of the necrotrophic fungal pathogens Sclerotinia sclerotiorum and Botrytis cinerea. PLoS Genetics, 7(8), e1002230. http://doi.org/10.1371/journal.pgen.1002230
Septoria	populicola	Seppo1	Ohm, R. A., Feau, N., Henrissat, B., Schoch, C. L., Horwitz, B. A., Barry, K. W., et al. (2012). Diverse lifestyles and strategies of plant pathogenesis encoded in the genomes of eighteen Dothideomycetes fungi. PLoS Pathogens, 8(12), e1003037. http://doi.org/10.1371/journal.ppat.1003037
Setosphaeria	turcica	Settu1	Ohm, R. A., Feau, N., Henrissat, B., Schoch, C. L., Horwitz, B. A., Barry, K. W., et al. (2012). Diverse lifestyles and strategies of plant pathogenesis encoded in the genomes of eighteen Dothideomycetes fungi. PLoS Pathogens, 8(12), e1003037. http://doi.org/10.1371/journal.ppat.1003037
Sodiomyces	alkalinus	Sodal1	Joint Genomics Institute of the US Department of Energy (http://jgi.doe.gov)
Spathaspora	passalidarum	Spapa3	Wohlbach, D. J., Kuo, A., Sato, T. K., Potts, K. M., Salamov, A. A., Labutti, K. M., et al. (2011). Comparative genomics of xylose-fermenting fungi for enhanced biofuel production. Proceedings of the National Academy of Sciences of the United States of America, 108(32), 13212–13217. http://doi.org/10.1073/pnas.1103039108
Sporopachydermia	lactativora	Spola1	Joint Genomics Institute of the US Department of Energy (http://jgi.doe.gov)
Stagonospora	nodorum	Stano2	Hane, J. K., Lowe, R. G. T., Solomon, P. S., Tan, K.-C., Schoch, C. L., Spatafora, J. W., et al. (2007). Dothideomycete plant interactions illuminated by genome sequencing and EST analysis of the wheat pathogen Stagonospora nodorum. The Plant Cell, 19(11), 3347–3368. http://doi.org/10.1105/tpc.107.052829
Sugiyamaella	americana	Sugame1	Joint Genomics Institute of the US Department of Energy (http://jgi.doe.gov)
Symbiotaphrina	kochii	Symko1	Joint Genomics Institute of the US Department of Energy (http://jgi.doe.gov)
Sympodiomyces	attinorum	Symat1	Joint Genomics Institute of the US Department of Energy (http://jgi.doe.gov)
Talaromyces	aculeatus	Penac1	Joint Genomics Institute of the US Department of Energy (http://jgi.doe.gov)
Taphrina	deformans	Tapde1_1	Cissé, O. H., Almeida, J. M. G. C. F., Fonseca, A., Kumar, A. A., Salojärvi, J., Overmyer, K., et al. (2013). Genome sequencing of the plant pathogen Taphrina deformans, the causal agent of peach leaf curl. mBio, 4(3), e00055–13. http://doi.org/10.1128/mBio.00055-13
Terfezia	boudieri	Terbo2	Joint Genomics Institute of the US Department of Energy (http://jgi.doe.gov)
Tetrapisispora	blattae	YGOB v7	Byrne, K. P., & Wolfe, K. H. (2005). The Yeast Gene Order Browser: Combining curated homology and syntenic context reveals gene fate in polyploid species. Genome Research, 15(10), 1456–1461. http://doi.org/10.1101/gr.3672308
Tetrapisispora	phaffii	YGOB v7	Byrne, K. P., & Wolfe, K. H. (2005). The Yeast Gene Order Browser: Combining curated homology and syntenic context reveals gene fate in polyploid species. Genome Research, 15(10), 1456–1461. http://doi.org/10.1101/gr.3672308
Thelebolus	microsporus	Themi1	Joint Genomics Institute of the US Department of Energy (http://jgi.doe.gov)
Thielavia	terrestris	Thite2	Berka, R. M., Grigoriev, I. V., Otillar, R., Salamov, A., Grimwood, J., Reid, I., et al. (2011). Comparative genomic analysis of the thermophilic biomass-degrading fungi <i>Myceliophthora thermophila</i> and <i>Thielavia terrestris</i>. Nature Biotechnology, 29(10), 922. http://doi.org/10.1038/nbt.1976
Torulaspora	delbrueckii	YGOB v7	Byrne, K. P., & Wolfe, K. H. (2005). The Yeast Gene Order Browser: Combining curated homology and syntenic context reveals gene fate in polyploid species. Genome Research, 15(10), 1456–1461. http://doi.org/10.1101/gr.3672308
Trichomonascus	petasosporus	Tripe1	Joint Genomics Institute of the US Department of Energy (http://jgi.doe.gov)
Trichophyton	rubrum	Triru1	Martinez, D. A., Oliver, B. G., Gräser, Y., Goldberg, J. M., Li, W., Martinez-Rossi, N. M., et al. (2012). Comparative Genome Analysis of Trichophyton rubrum and Related Dermatophytes Reveals Candidate Genes Involved in Infection. mBio, 3(5), e00259–12. http://doi.org/10.1128/mBio.00259-12
Trichophyton	verrucosum	Triver1	Burmester, A., Shelest, E., Glöckner, G., Heddergott, C., Schindler, S., Staib, P., et al. (2011). Comparative and functional genomics provide insights into the pathogenicity of dermatophytic fungi. Genome Biology, 12(1), R7. http://doi.org/10.1186/gb-2011-12-1-r7
Trinosporium	guianense	Trigu1	Joint Genomics Institute of the US Department of Energy (http://jgi.doe.gov)
Tuber	melanosporum	Tubme1	Martin, F., Kohler, A., Murat, C., Balestrini, R., Coutinho, P. M., Jaillon, O., et al. (2010). Périgord black truffle genome uncovers evolutionary origins and mechanisms of symbiosis. Nature, 464(7291), 1033–1038. http://doi.org/10.1038/nature08867
Uncinocarpus	reesii	Uncre1	Sharpton, T. J., Stajich, J. E., Rounsley, S. D., Gardner, M. J., Wortman, J. R., Jordar, V. S., et al. (2009). Comparative genomic analyses of the human fungal pathogens Coccidioides and their relatives. Genome Research. http://doi.org/10.1101/gr.087551.108
Vanderwaltozyma	polysporus	YGOB v7	Byrne, K. P., & Wolfe, K. H. (2005). The Yeast Gene Order Browser: Combining curated homology and syntenic context reveals gene fate in polyploid species. Genome Research, 15(10), 1456–1461. http://doi.org/10.1101/gr.3672309
Venturia	pirina	Venpi1	Deng, C. H., Plummer, K. M., Jones, D. A. B., Mesarich, C. H., Shiller, J., Taranto, A. P., et al. (2017). Comparative analysis of the predicted secretomes of Rosaceae scab pathogens Venturia inaequalis and V. pirina reveals expanded effector families and putative determinants of host range. BMC Genomics, 18(1), 339. http://doi.org/10.1186/s12864-017-3699-1
Verticillium	alfalfae	Veral1	Klosterman, S. J., Subbarao, K. V., Kang, S., Veronese, P., Gold, S. E., Thomma, B. P. H. J., et al. (2011). Comparative genomics yields insights into niche adaptation of plant vascular wilt pathogens. PLoS Pathogens, 7(7), e1002137. http://doi.org/10.1371/journal.ppat.1002137
Wickerhamomyces	anomalus	Wican1	Riley, R., Haridas, S., Wolfe, K. H., Lopes, M. R., Hittinger, C. T., Göker, M., et al. (2016). Comparative genomics of biotechnologically important yeasts. Proceedings of the National Academy of Sciences, 113(35), 9882–9887. http://doi.org/10.1073/pnas.1603941113
Xylona	heveae	Xylhe1	The genome of Xylona heveae provides a window into fungal endophytism. (2016). The genome of Xylona heveae provides a window into fungal endophytism, 120(1), 26–42. http://doi.org/10.1016/j.funbio.2015.10.002
Yarrowia	lipolytica	Yarli1	Dujon, B., Sherman, D., Fischer, G., Durrens, P., Casaregola, S., Lafontaine, I., et al. (2004). Genome evolution in yeasts. Nature, 430(6995), 35–44. http://doi.org/10.1038/nature02579
Zygoascus	hellenicus	Zyghe1_2	Joint Genomics Institute of the US Department of Energy (http://jgi.doe.gov)
Zygosaccharomyces	rouxii	YGOB v7	Byrne, K. P., & Wolfe, K. H. (2005). The Yeast Gene Order Browser: Combining curated homology and syntenic context reveals gene fate in polyploid species. Genome Research, 15(10), 1456–1461. http://doi.org/10.1101/gr.3672309
Zymoseptoria	ardabiliae	Zymar1	Stukenbrock, E. H., Christiansen, F. B., Hansen, T. T., Dutheil, J. Y., & Schierup, M. H. (2012). Fusion of two divergent fungal individuals led to the recent emergence of a unique widespread pathogen species. Proceedings of the National Academy of Sciences, 109(27), 10954–10959. http://doi.org/10.1073/pnas.1201403109
