# Supplementary figures and images for: Intrinsic cooperativity potentiates parallel cis-regulatory evolution
Source: eLife journal article supplement (doi:10.7554/elife.37563), 2018-09-10

transcription factor  
binding site density:

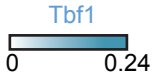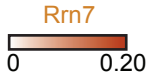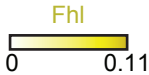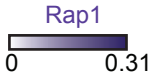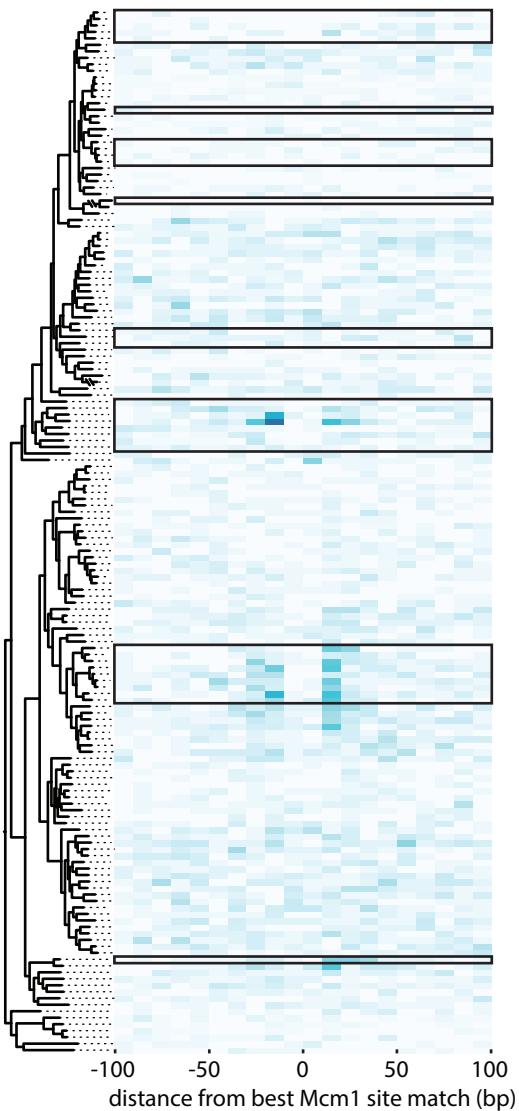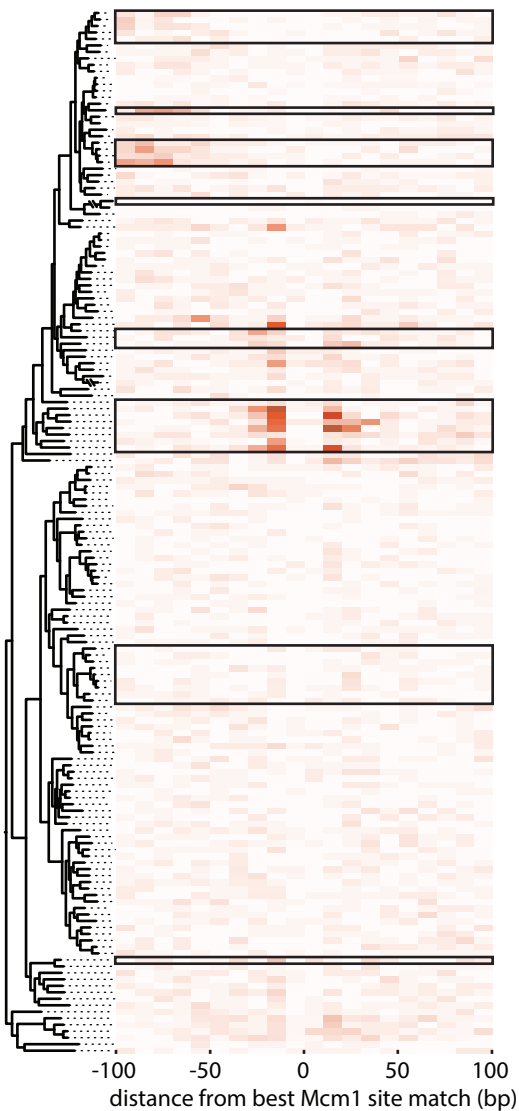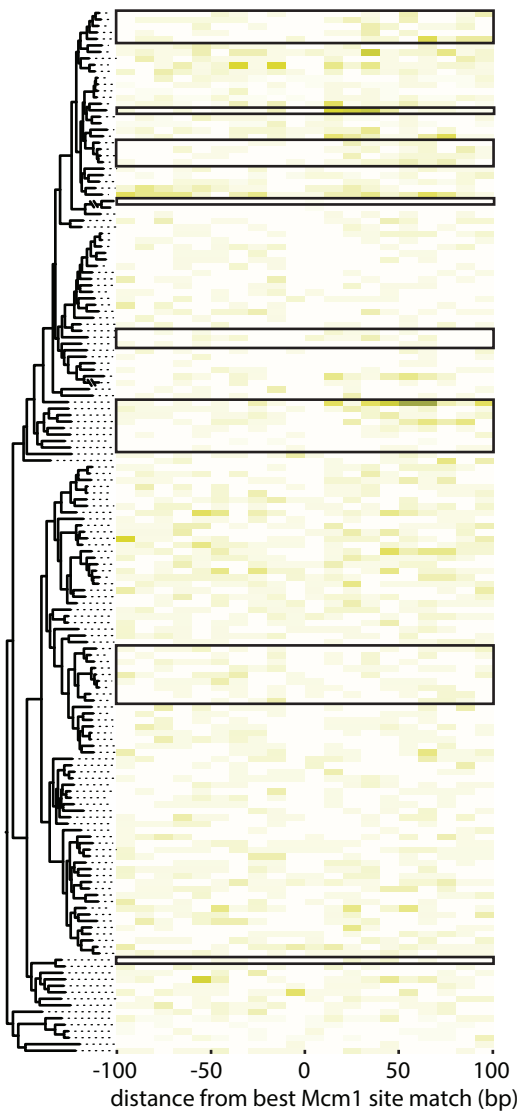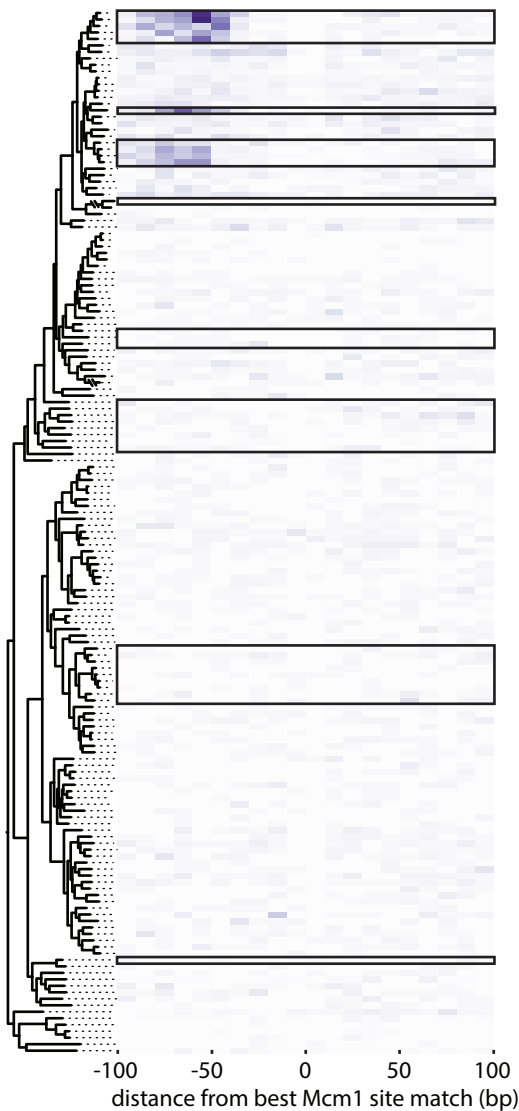

Supplement: supp [file elife-37563-supp-v1.zip]

A

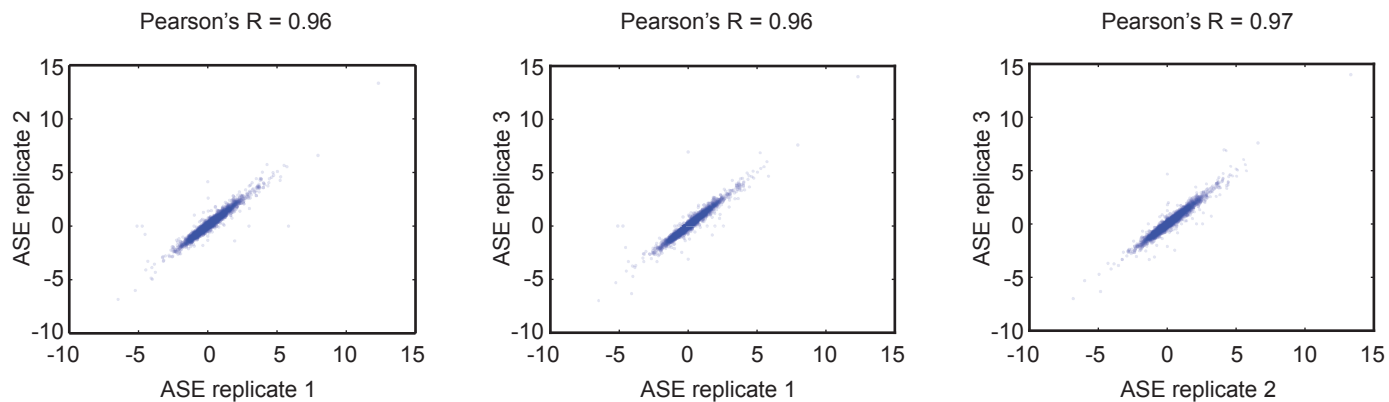

B

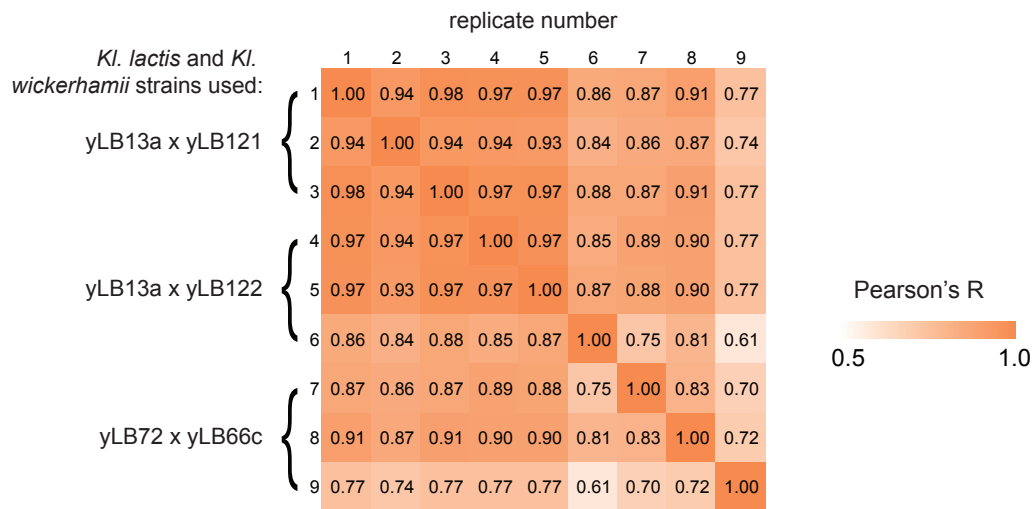

Supplement: supp [file elife-37563-supp-v1.zip]

A

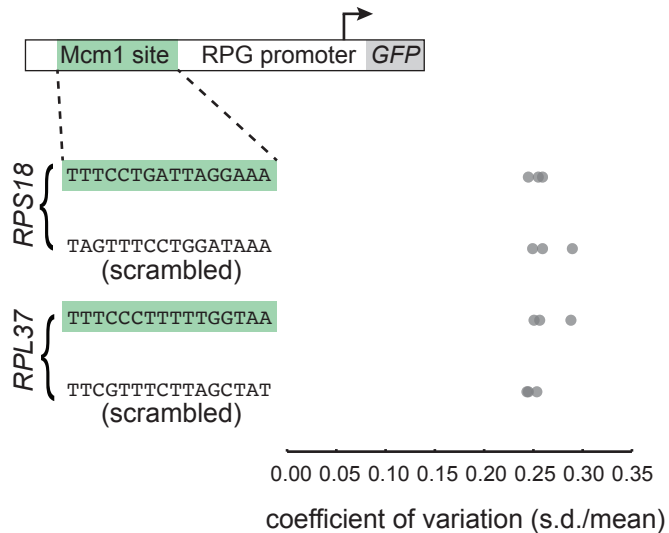

B

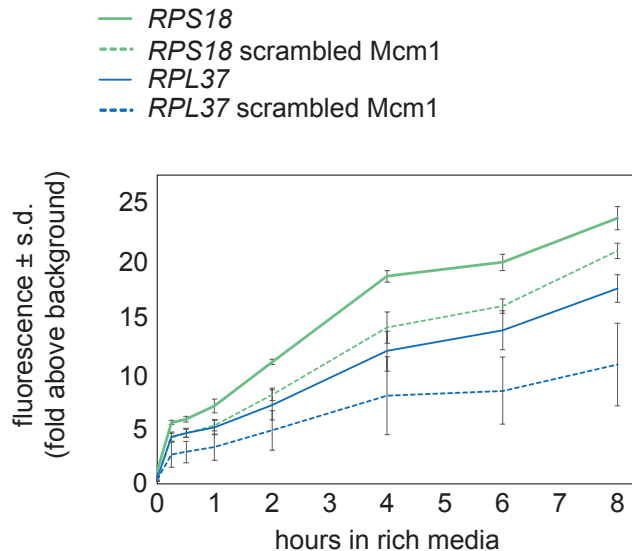

Supplement: supp [file elife-37563-supp-v1.zip]

A

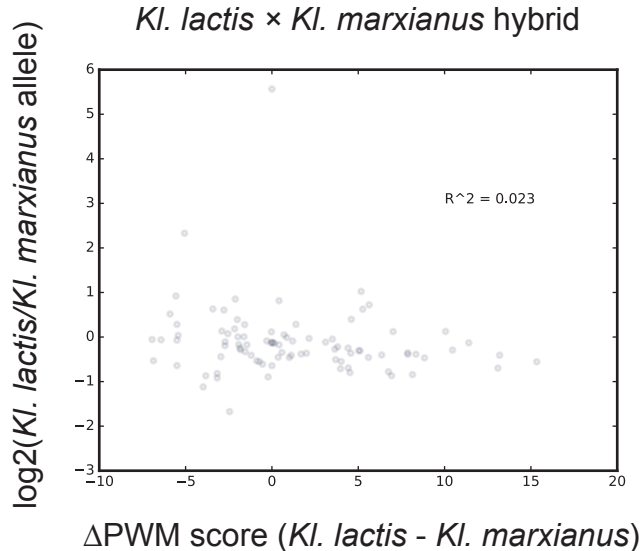

B

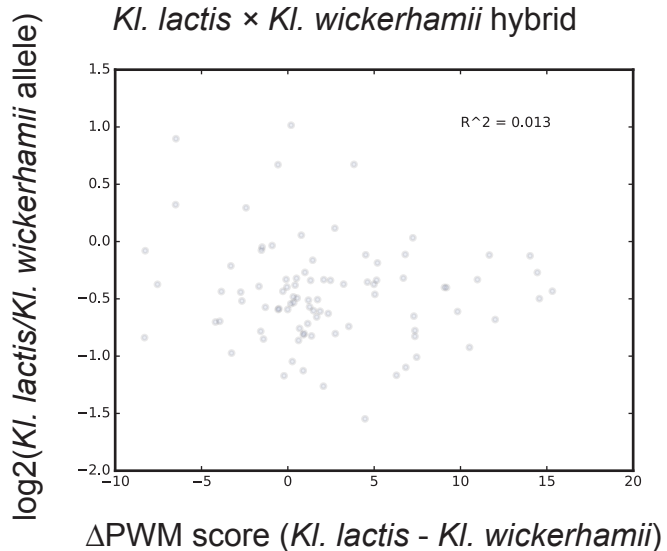

Supplement: supp [file elife-37563-supp-v1.zip]

phylogenetic distribution  
of binding sites:

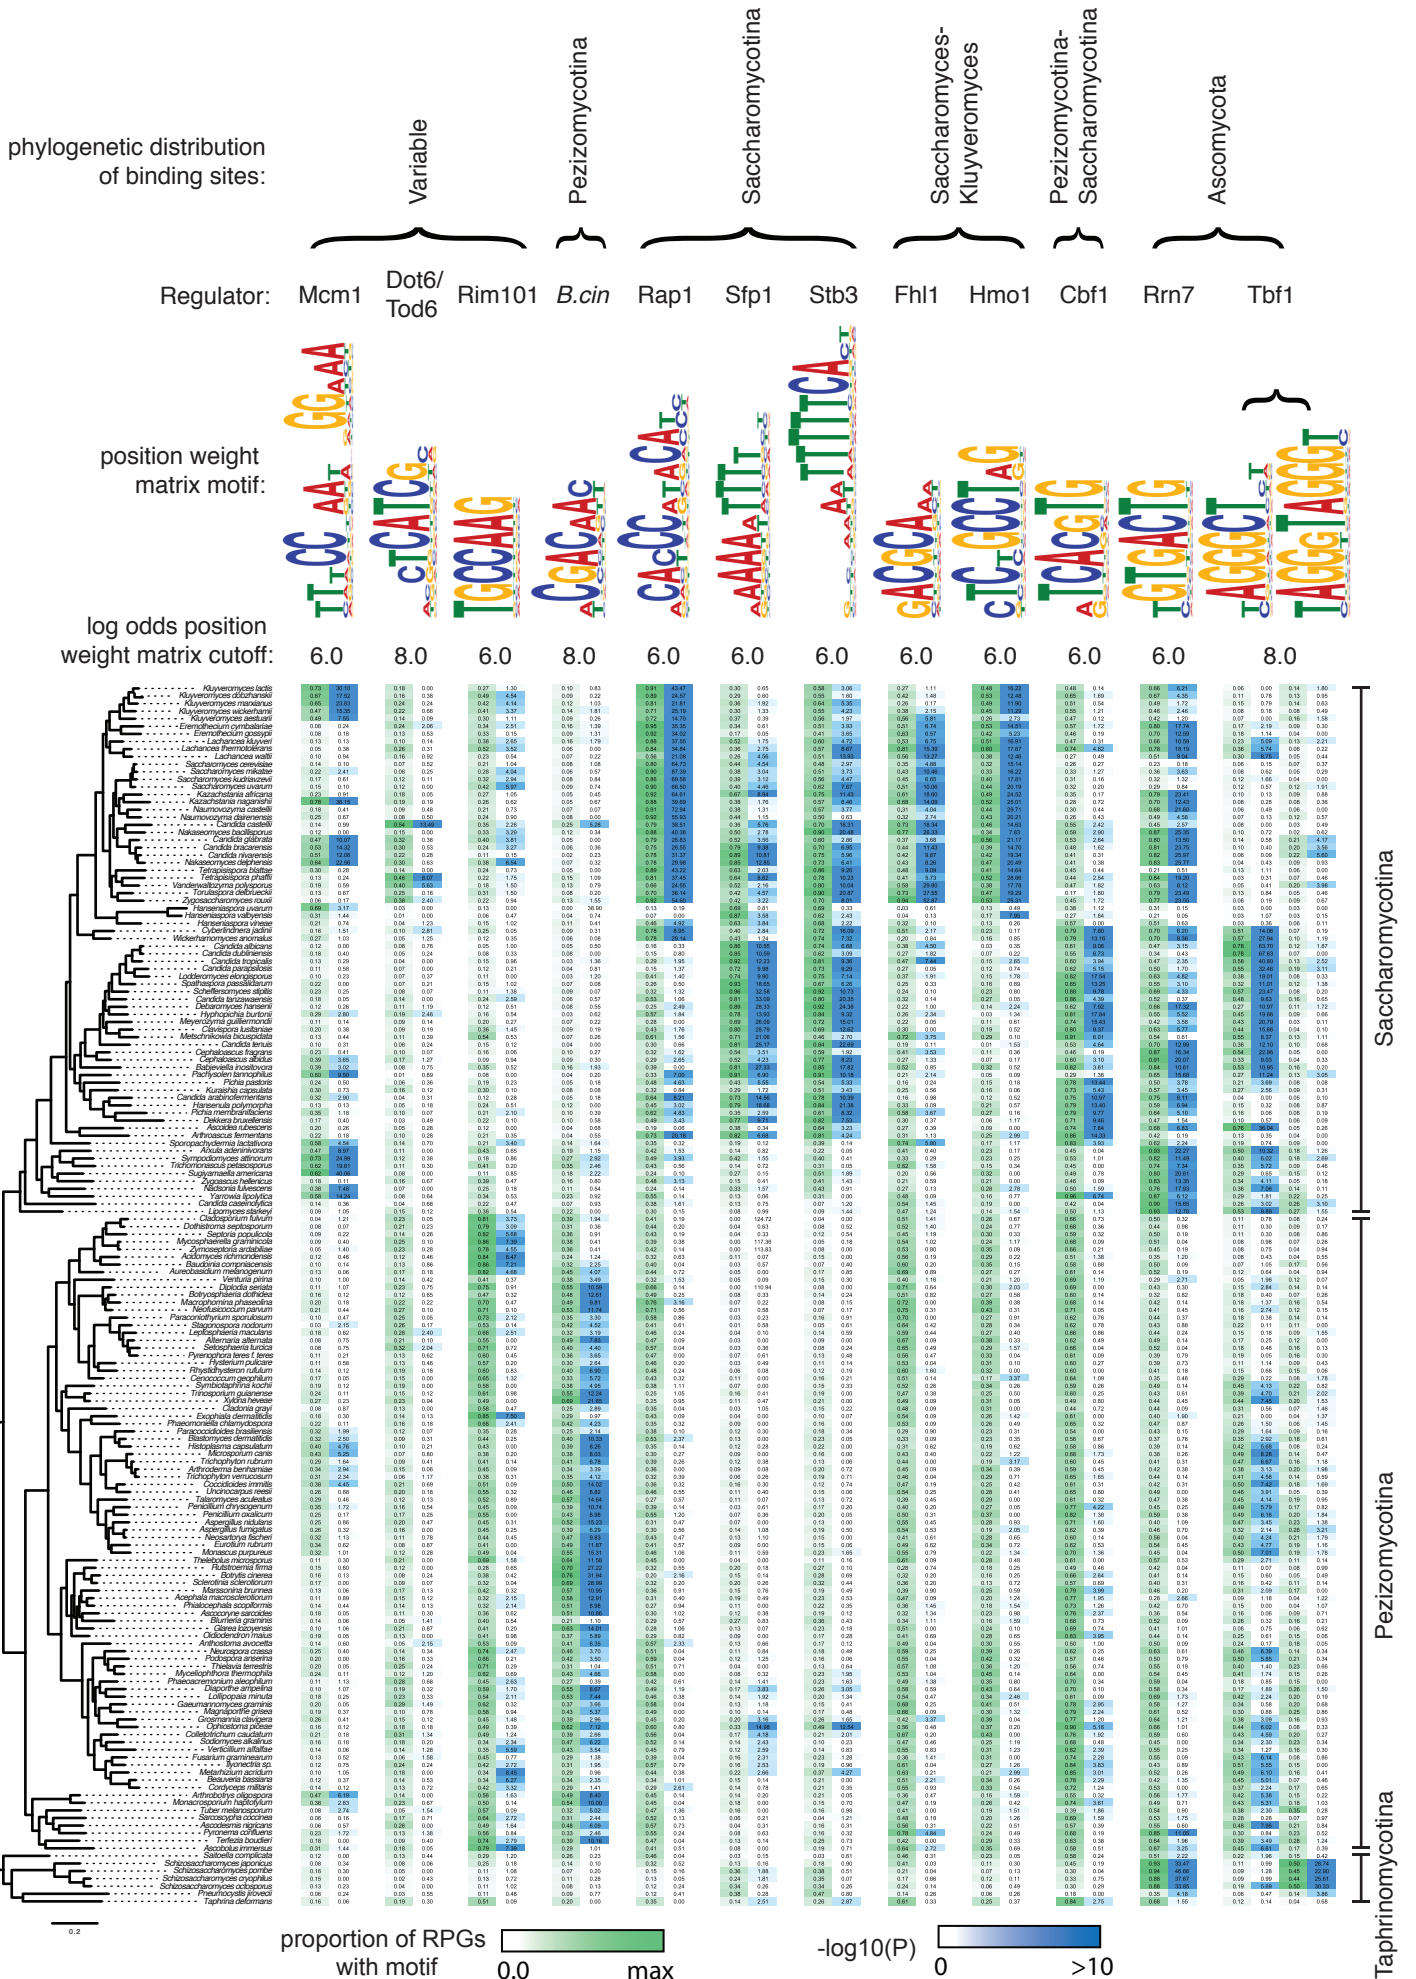

Supplement: supp [file elife-37563-supp-v1.zip]
